# Supplementary material for: Genome-Wide Association Studies on the Kernel Row Number in a Multi-Parent Maize Population
Source: MDPI journal article supplement (doi:10.3390/ijms25063377), 2024-03-16
Supplement: s1 [file s1]

## Supplementary Table S1-2

Table S1: Significant SNPs obtained through GWAS†

| Loc  | num_snp | gene_num | peakPOS   | Chr | Bin   | PVE (%) | P(-log10) |
|------|---------|----------|-----------|-----|-------|---------|-----------|
| 21YS | 1       | 2        | 242858336 | 2   | 2.24  | 17.74   | 5.98      |
|      | 1       | 0        | 180296831 | 8   | 8.18  | 6.34    | 5.08      |
| 22YS | 3       | 3        | 126528998 | 10  | 10.12 | 14.88   | 5.64      |
| 19BS | 1       | 0        | 135828991 | 6   | 6.13  | 3.24    | 5.15      |
| 19DH | 1       | 0        | 120370778 | 5   | 5.12  | 8.83    | 5.05      |
|      | 5       | 2        | 177304649 | 7   | 7.17  | 6.40    | 6.03      |
| 21JH | 1       | 31       | 76395713  | 1   | 1.07  | 9.09    | 5.16      |
|      | 1       |          | 83163645  | 1   | 1.08  | 21.01   | 6.40      |
|      | 1       |          | 198129347 | 1   | 1.19  | 7.02    | 6.01      |
|      | 1       |          | 199106836 | 1   | 1.19  | 6.14    | 5.89      |
|      | 1       |          | 199222030 | 1   | 1.19  | 8.42    | 6.64      |
|      | 1       |          | 199314176 | 1   | 1.19  | 6.49    | 5.63      |
|      | 1       |          | 199335283 | 1   | 1.19  | 4.73    | 5.18      |
|      | 3       |          | 201355723 | 1   | 1.20  | 5.57    | 5.70      |
|      | 1       |          | 254646097 | 1   | 1.25  | 14.18   | 6.05      |
|      | 2       |          | 257676626 | 1   | 1.25  | 5.69    | 5.58      |
|      | 1       |          | 306464753 | 1   | 1.30  | 8.58    | 5.56      |
|      | 1       |          | 42354101  | 2   | 2.04  | 5.88    | 5.65      |
|      | 1       |          | 104677372 | 2   | 2.10  | 9.92    | 5.79      |
|      | 1       |          | 192141542 | 2   | 2.19  | 12.01   | 5.79      |
|      | 1       |          | 195713294 | 2   | 2.19  | 6.56    | 5.36      |
|      | 1       |          | 214756894 | 2   | 2.21  | 12.53   | 6.10      |
|      | 3       |          | 215468689 | 2   | 2.21  | 14.31   | 6.12      |
|      | 1       |          | 24283034  | 3   | 3.02  | 13.44   | 5.29      |
|      | 1       |          | 135283055 | 4   | 4.13  | 6.70    | 6.13      |
|      | 1       |          | 187159704 | 4   | 4.18  | 9.96    | 6.37      |
|      | 4       |          | 46725146  | 5   | 5.04  | 10.57   | 8.39      |
|      | 2       |          | 138554600 | 5   | 5.13  | 8.40    | 5.42      |
|      | 1       |          | 150393177 | 5   | 5.15  | 10.64   | 5.98      |
|      | 1       |          | 30305673  | 6   | 6.03  | 8.89    | 6.31      |
|      | 1       |          | 71741394  | 6   | 6.07  | 7.79    | 5.82      |
|      | 2       |          | 71920788  | 6   | 6.07  | 6.33    | 6.24      |
|      | 1       |          | 76471294  | 6   | 6.07  | 8.70    | 5.98      |
|      | 2       |          | 84033777  | 8   | 8.08  | 9.61    | 8.61      |
|      | 1       |          | 146316294 | 8   | 8.14  | 5.61    | 5.95      |
|      | 1       |          | 68447065  | 10  | 10.06 | 11.15   | 5.00      |
| SUM  | 53      | 38       |           |     |       |         |           |

†Loc: Refers to the Environment or Location where the association was detected.  
 Chr: Indicates the Chromosome on which the significant SNP is located.  
 PVE: Represents the Proportion of Phenotypic Variance Explained by the associated SNP.  
 P: Represents the p-value.

Table S2: Summary of Genetic Linkage Groups of two RIL populations†

| population | Chr          | Marker number | Length (cM)    | inter marker | Max-gap      |
|------------|--------------|---------------|----------------|--------------|--------------|
| Sub-pop3   | lg01         | 180           | 169            | 0.94         | 5.95         |
|            | lg02         | 93            | 117.35         | 1.26         | 9.08         |
|            | lg03         | 117           | 109.28         | 0.93         | 10.05        |
|            | lg04         | 131           | 118.91         | 0.91         | 4.72         |
|            | lg05         | 85            | 78.41          | 0.92         | 9.56         |
|            | lg06         | 91            | 162.62         | 1.79         | 17.5         |
|            | lg07         | 96            | 121.87         | 1.27         | 12.12        |
|            | lg08         | 84            | 58.93          | 0.7          | 5.54         |
|            | lg09         | 66            | 76.24          | 1.16         | 13.78        |
|            | lg10         | 38            | 33.23          | 0.87         | 4.33         |
|            | <b>Total</b> | <b>981</b>    | <b>1045.83</b> | <b>1.07</b>  | <b>17.5</b>  |
| Sub-pop4   | lg01         | 144           | 148.39         | 1.03         | 17.75        |
|            | lg02         | 78            | 76.86          | 0.99         | 8.47         |
|            | lg03         | 89            | 83.28          | 0.94         | 11.78        |
|            | lg04         | 109           | 151.08         | 1.39         | 28.89        |
|            | lg05         | 80            | 64.76          | 0.81         | 6.6          |
|            | lg06         | 61            | 95.89          | 1.57         | 12.68        |
|            | lg07         | 80            | 63.94          | 0.8          | 8.47         |
|            | lg08         | 54            | 53.92          | 1            | 9.26         |
|            | lg09         | 56            | 41.88          | 0.75         | 6.24         |
|            | lg10         | 70            | 48.27          | 0.69         | 3.56         |
|            | <b>Total</b> | <b>821</b>    | <b>828.27</b>  | <b>1.01</b>  | <b>28.89</b> |

†lg1,lg2,...lg10 represent chromosome 1,2, ...10, respectively. Marker-number: indicates the number of SNP markers. Length: The total genetic distance of each chromosome (cM); Average\_length: average genetic distance (cM). Max-gap: refers to the maximum allowable gap or distance between adjacent genetic markers (usually microsatellites or SNPs) along a chromosome.
