# Supplementary material for: Genome-Wide Association Studies on the Kernel Row Number in a Multi-Parent Maize Population
Source: MDPI journal article supplement (doi:10.3390/ijms25063377), 2024-03-16
Supplement: s1 [file s1]

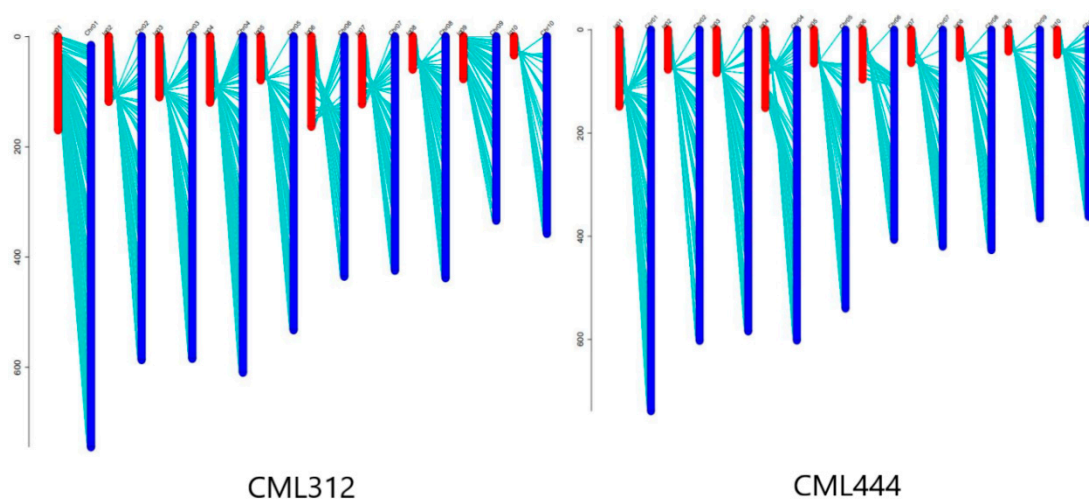

Figure S1: Co-linearity analysis between genetic and physical maps (Red represents 18 linkage groups, and blue represents chromosomes, i.e., physical maps.)
