# Supplementary material for: Genome-Wide Association Studies on the Kernel Row Number in a Multi-Parent Maize Population
Source: MDPI journal article supplement (doi:10.3390/ijms25063377), 2024-03-16
Supplement: s1 [file s1]

## Supplementary Table S4

Table S4 Consistently detected QTLs in six environments and BLUP in two sub-populations (Pop)<sup>†</sup>

| Pop      | Loc  | Marker | Chr | Position(cM) | LOD      |
|----------|------|--------|-----|--------------|----------|
| Sub-pop3 | 19BS | mk563  | 5   | 47.81        | 2.813415 |
|          |      | mk562  | 5   | 48.17        | 2.947647 |
|          |      | mk907  | 9   | 29.91        | 4.435625 |
|          |      | mk908  | 9   | 30.24        | 4.369219 |
|          |      | mk908  | 9   | 31.24        | 3.700967 |
|          |      | mk909  | 9   | 31.25        | 3.688945 |
|          |      | mk912  | 9   | 33.97        | 3.807416 |
|          |      | mk90   | 1   | 82.76        | 5.238167 |
|          |      | mk91   | 1   | 83.47        | 5.499796 |
|          |      | mk92   | 1   | 84.14        | 5.589958 |
|          |      | mk93   | 1   | 84.48        | 5.637543 |
|          |      | mk93   | 1   | 85.48        | 6.282973 |
|          |      | mk94   | 1   | 85.84        | 6.296636 |
|          |      | mk95   | 1   | 86.17        | 6.29901  |
|          |      | mk96   | 1   | 86.84        | 5.813353 |
|          |      | mk97   | 1   | 87.18        | 5.705053 |
|          |      | mk111  | 1   | 95.58        | 5.550556 |
|          | 19DH | mk93   | 1   | 85.48        | 3.051815 |
|          |      | mk94   | 1   | 85.84        | 3.143676 |
|          |      | mk95   | 1   | 86.17        | 3.143905 |
|          |      | mk96   | 1   | 86.84        | 2.958989 |
|          |      | mk97   | 1   | 87.18        | 2.804033 |
|          |      | mk111  | 1   | 95.58        | 2.64608  |
|          |      | mk563  | 5   | 47.81        | 2.952361 |
|          |      | mk562  | 5   | 48.17        | 2.919248 |
|          | 22YS | mk907  | 9   | 29.91        | 2.874622 |
|          |      | mk908  | 9   | 30.24        | 2.715203 |
|          |      | mk908  | 9   | 31.24        | 2.565146 |
|          |      | mk909  | 9   | 31.25        | 2.559051 |
|          |      | mk912  | 9   | 33.97        | 3.807416 |
|          |      | mk401  | 4   | 113.79       | 4.070378 |
|          |      | mk400  | 4   | 114.22       | 4.138289 |
|          |      | mk399  | 4   | 114.89       | 3.906295 |
|          |      | mk398  | 4   | 115.22       | 3.905721 |
|          |      | mk398  | 4   | 116.22       | 3.871544 |
|          |      | mk397  | 4   | 116.24       | 3.860575 |

|          |      |       |   |        |          |
|----------|------|-------|---|--------|----------|
|          |      | mk396 | 4 | 116.57 | 3.187334 |
|          |      | mk401 | 4 | 113.79 | 2.866335 |
|          |      | mk400 | 4 | 114.22 | 3.016834 |
|          |      | mk399 | 4 | 114.89 | 2.750404 |
|          | BLUP | mk398 | 4 | 115.22 | 2.734766 |
|          |      | mk398 | 4 | 116.22 | 2.650455 |
|          |      | mk397 | 4 | 116.24 | 2.651615 |
|          |      | mk396 | 4 | 116.57 | 2.688204 |
|          | 21JH | mk396 | 4 | 76.5   | 4.163719 |
| Sub-pop4 | 19BS | mk225 | 2 | 72.39  | 2.635027 |
|          | 21YS | mk396 | 4 | 76.5   | 2.71844  |

† BLUP, the best linear unbiased prediction; 21YS, Yanshan in 2021; 21JH, Jinghong in 2021; 22YS, Yanshan in 2022; 19BS, Baoshan in 2019; 19DH, Dehong in 2019. Sub-pop3 and Sub-pop4: CML312 and CML444 lines were used for developing two subpopulations by crossing with Ye107. The same marker name between different populations does not necessarily indicate the same QTL. However, the same marker name indicates the same QTL within the same population.
