# Supplementary material for: Genome-Wide Association Studies on the Kernel Row Number in a Multi-Parent Maize Population
Source: Int J Mol Sci. 2024 Mar 16;25(6):3377. doi: 10.3390/ijms25063377 (PMC10970222; doi:10.3390/ijms25063377)
Supplement: Supplementary file 1 [file ijms-25-03377-s001.zip]

Archive with 8 entries (8 files):
- FIG S1.pdf
- FIG S2.pdf
- Supplemental_Tables_1_2.pdf
- Supplemental_Tables_4.pdf
- Supplemental_Tables_7.pdf
- Table S3.xlsx
- Table S5.xlsx
- Table S6.xlsx
