# Supplementary material for: Genome-Wide Association Studies on the Kernel Row Number in a Multi-Parent Maize Population
Source: Int J Mol Sci. 2024 Mar 16;25(6):3377. doi: 10.3390/ijms25063377 (PMC10970222; doi:10.3390/ijms25063377)
Supplement: Supplementary file 1 [file ijms-25-03377-s001.zip › Table S3.xlsx]

## Sheet: Sheet1
Table S3 QTL location information summary table
population	Trait	Chromosom	Start	End	Length	nQTLs	summary
Sub-pop3	19BS	5	94562917	126478051	31915134	4	23
	19BS	9	30944251	49864866	18920615	19
	19DH	1	139616149	252952675	113336526	68	69
	19DH	3	17098052	17098052	0	1
	21YS	3	158949112	161467045	2517933	4	27
	21YS	4	58471991	73333003	14861012	12
	21YS	7	41189213	51366964	10177751	11
	21JH	1	124747888	126105939	1358051	2	29
	21JH	4	75627569	151339536	75711967	20
	21JH	9	52803554	67369323	14565769	7
	22YS	3	193353260	194947153	1593893	3	23
	22YS	4	8043739	18953659	10909920	20
	BLUP	4	8043739	10683376	2639637	7	7
Sub-pop4	19BS	2	54148901	54148901	0	1	1
	21YS	4	31409140	31409140	0	1	38
	21YS	5	76615734	181154647	104538913	37
	21JH	4	1	31671021	31671020	31	31
	22YS	4	46403895	172368609	125964714	29	29
Total							277
Note：Sub-pop3，CML312 × Ye107；Sub-pop4，CML444× Ye107.
