# Supplementary material for: Genome-Wide Association Studies on the Kernel Row Number in a Multi-Parent Maize Population
Source: Int J Mol Sci. 2024 Mar 16;25(6):3377. doi: 10.3390/ijms25063377 (PMC10970222; doi:10.3390/ijms25063377)
Supplement: Supplementary file 1 [file ijms-25-03377-s001.zip › Table S5.xlsx]

## Sheet: Sheet1
Table S5 GO Analysis
Sub-Pop3/21JH and Sub-pop4/22YS	Category	GOID	Description	GeneRatio	BgRatio	pvalue	padj	geneID	geneName	Count
	BP	GO:0015780	nucleotide-sugar transmembrane transport	2/170	10/10281	0.0112107	0.64028	Zm00001d050851/Zm00001d051014	-/-	2
	BP	GO:0090481	pyrimidine nucleotide-sugar transmembrane transport	2/170	10/10281	0.0112107	0.64028	Zm00001d050851/Zm00001d051014	-/-	2
	BP	GO:0006914	autophagy	2/170	11/10281	0.0135542	0.64028	Zm00001d051021/Zm00001d051033	-/-	2
	BP	GO:0061919	process utilizing autophagic mechanism	2/170	11/10281	0.0135542	0.64028	Zm00001d051021/Zm00001d051033	-/-	2
	BP	GO:0006325	chromatin organization	4/170	63/10281	0.0201865	0.64028	Zm00001d050244/Zm00001d050368/Zm00001d050874/Zm00001d051126	-/-/-/-	4
	BP	GO:1901264	carbohydrate derivative transport	2/170	14/10281	0.0217104	0.64028	Zm00001d050851/Zm00001d051014	-/-	2
	BP	GO:0015698	inorganic anion transport	3/170	38/10281	0.0245411	0.64028	Zm00001d050283/Zm00001d051050/Zm00001d051103	-/-/-	3
	BP	GO:0006821	chloride transport	2/170	18/10281	0.0349645	0.64028	Zm00001d051050/Zm00001d051103	-/-	2
	BP	GO:0006497	protein lipidation	2/170	23/10281	0.0548076	0.64028	Zm00001d051025/Zm00001d051136	-/-	2
	BP	GO:0006505	GPI anchor metabolic process	2/170	23/10281	0.0548076	0.64028	Zm00001d051025/Zm00001d051136	-/-	2
	BP	GO:0006506	GPI anchor biosynthetic process	2/170	23/10281	0.0548076	0.64028	Zm00001d051025/Zm00001d051136	-/-	2
	BP	GO:0006661	phosphatidylinositol biosynthetic process	2/170	23/10281	0.0548076	0.64028	Zm00001d051025/Zm00001d051136	-/-	2
	BP	GO:0042157	lipoprotein metabolic process	2/170	23/10281	0.0548076	0.64028	Zm00001d051025/Zm00001d051136	-/-	2
	BP	GO:0042158	lipoprotein biosynthetic process	2/170	23/10281	0.0548076	0.64028	Zm00001d051025/Zm00001d051136	-/-	2
	BP	GO:0070647	protein modification by small protein conjugation or removal	5/170	127/10281	0.0593856	0.64028	Zm00001d050308/Zm00001d050488/Zm00001d050489/Zm00001d050689/Zm00001d050712	-/-/-/-/-	5
	BP	GO:0015931	nucleobase-containing compound transport	2/170	25/10281	0.0636211	0.64028	Zm00001d050851/Zm00001d051014	-/-	2
	BP	GO:0006334	nucleosome assembly	2/170	27/10281	0.072874	0.64028	Zm00001d050368/Zm00001d050874	-/-	2
	BP	GO:0031497	chromatin assembly	2/170	27/10281	0.072874	0.64028	Zm00001d050368/Zm00001d050874	-/-	2
	BP	GO:0006323	DNA packaging	2/170	28/10281	0.0776533	0.64028	Zm00001d050368/Zm00001d050874	-/-	2
	BP	GO:0034728	nucleosome organization	2/170	28/10281	0.0776533	0.64028	Zm00001d050368/Zm00001d050874	-/-	2
	BP	GO:0065004	protein-DNA complex assembly	2/170	28/10281	0.0776533	0.64028	Zm00001d050368/Zm00001d050874	-/-	2
	BP	GO:0006333	chromatin assembly or disassembly	2/170	29/10281	0.0825284	0.64028	Zm00001d050368/Zm00001d050874	-/-	2
	BP	GO:0006664	glycolipid metabolic process	2/170	29/10281	0.0825284	0.64028	Zm00001d051025/Zm00001d051136	-/-	2
	BP	GO:0009247	glycolipid biosynthetic process	2/170	29/10281	0.0825284	0.64028	Zm00001d051025/Zm00001d051136	-/-	2
	BP	GO:0016569	covalent chromatin modification	2/170	29/10281	0.0825284	0.64028	Zm00001d050244/Zm00001d051126	-/-	2
	BP	GO:0016570	histone modification	2/170	29/10281	0.0825284	0.64028	Zm00001d050244/Zm00001d051126	-/-	2
	BP	GO:0046467	membrane lipid biosynthetic process	2/170	29/10281	0.0825284	0.64028	Zm00001d051025/Zm00001d051136	-/-	2
	BP	GO:0071824	protein-DNA complex subunit organization	2/170	29/10281	0.0825284	0.64028	Zm00001d050368/Zm00001d050874	-/-	2
	BP	GO:1903509	liposaccharide metabolic process	2/170	29/10281	0.0825284	0.64028	Zm00001d051025/Zm00001d051136	-/-	2
	BP	GO:0006643	membrane lipid metabolic process	2/170	32/10281	0.0976849	0.64028	Zm00001d051025/Zm00001d051136	-/-	2
	BP	GO:0046474	glycerophospholipid biosynthetic process	2/170	33/10281	0.1029	0.64028	Zm00001d051025/Zm00001d051136	-/-	2
	BP	GO:0006486	protein glycosylation	3/170	69/10281	0.10585	0.64028	Zm00001d050251/Zm00001d050885/Zm00001d050961	-/-/-	3
	BP	GO:0009100	glycoprotein metabolic process	3/170	69/10281	0.10585	0.64028	Zm00001d050251/Zm00001d050885/Zm00001d050961	-/-/-	3
	BP	GO:0009101	glycoprotein biosynthetic process	3/170	69/10281	0.10585	0.64028	Zm00001d050251/Zm00001d050885/Zm00001d050961	-/-/-	3
	BP	GO:0043413	macromolecule glycosylation	3/170	69/10281	0.10585	0.64028	Zm00001d050251/Zm00001d050885/Zm00001d050961	-/-/-	3
	BP	GO:0045017	glycerolipid biosynthetic process	2/170	35/10281	0.113551	0.64028	Zm00001d051025/Zm00001d051136	-/-	2
	BP	GO:0006820	anion transport	3/170	74/10281	0.123604	0.64028	Zm00001d050283/Zm00001d051050/Zm00001d051103	-/-/-	3
	BP	GO:0070085	glycosylation	3/170	75/10281	0.127278	0.64028	Zm00001d050251/Zm00001d050885/Zm00001d050961	-/-/-	3
	BP	GO:0016071	mRNA metabolic process	3/170	76/10281	0.130991	0.64028	Zm00001d050266/Zm00001d050316/Zm00001d051123	-/-/-	3
	BP	GO:0042254	ribosome biogenesis	3/170	78/10281	0.13853	0.64028	Zm00001d050515/Zm00001d050595/Zm00001d051116	-/-/-	3
	BP	GO:0051276	chromosome organization	10/170	408/10281	0.138646	0.64028	Zm00001d050244/Zm00001d050287/Zm00001d050368/Zm00001d050378/Zm00001d050503/Zm00001d050541/Zm00001d050627/Zm00001d050874/Zm00001d050944/Zm00001d051126	-/-/-/-/-/-/-/-/-/-	10
	BP	GO:0016567	protein ubiquitination	3/170	79/10281	0.142354	0.64028	Zm00001d050308/Zm00001d050689/Zm00001d050712	-/-/-	3
	BP	GO:0000280	nuclear division	1/170	10/10281	0.153639	0.64028	Zm00001d050944	-	1
	BP	GO:0006771	riboflavin metabolic process	1/170	10/10281	0.153639	0.64028	Zm00001d050844	-	1
	BP	GO:0009231	riboflavin biosynthetic process	1/170	10/10281	0.153639	0.64028	Zm00001d050844	-	1
	BP	GO:0042726	flavin-containing compound metabolic process	1/170	10/10281	0.153639	0.64028	Zm00001d050844	-	1
	BP	GO:0042727	flavin-containing compound biosynthetic process	1/170	10/10281	0.153639	0.64028	Zm00001d050844	-	1
	BP	GO:0098813	nuclear chromosome segregation	1/170	10/10281	0.153639	0.64028	Zm00001d050944	-	1
	BP	GO:0032446	protein modification by small protein conjugation	3/170	82/10281	0.154033	0.64028	Zm00001d050308/Zm00001d050689/Zm00001d050712	-/-/-	3
	BP	GO:0009143	nucleoside triphosphate catabolic process	1/170	11/10281	0.167648	0.64028	Zm00001d050533	-	1
	BP	GO:0009719	response to endogenous stimulus	4/170	130/10281	0.168378	0.64028	Zm00001d050507/Zm00001d050781/Zm00001d051127/Zm00001d051172	-/-/-/-	4
	BP	GO:0009725	response to hormone	4/170	130/10281	0.168378	0.64028	Zm00001d050507/Zm00001d050781/Zm00001d051127/Zm00001d051172	-/-/-/-	4
	BP	GO:0010033	response to organic substance	4/170	130/10281	0.168378	0.64028	Zm00001d050507/Zm00001d050781/Zm00001d051127/Zm00001d051172	-/-/-/-	4
	BP	GO:0035556	intracellular signal transduction	3/170	86/10281	0.170052	0.64028	Zm00001d050768/Zm00001d050984/Zm00001d051114	-/-/-	3
	BP	GO:0016579	protein deubiquitination	2/170	45/10281	0.170285	0.64028	Zm00001d050488/Zm00001d050489	-/-	2
	BP	GO:0070646	protein modification by small protein removal	2/170	45/10281	0.170285	0.64028	Zm00001d050488/Zm00001d050489	-/-	2
	BP	GO:0000278	mitotic cell cycle	1/170	12/10281	0.181426	0.64028	Zm00001d050944	-	1
	BP	GO:0006298	mismatch repair	1/170	12/10281	0.181426	0.64028	Zm00001d050929	-	1
	BP	GO:0006487	protein N-linked glycosylation	1/170	12/10281	0.181426	0.64028	Zm00001d050961	-	1
	BP	GO:0007059	chromosome segregation	1/170	12/10281	0.181426	0.64028	Zm00001d050944	-	1
	BP	GO:0006952	defense response	2/170	47/10281	0.182148	0.64028	Zm00001d050803/Zm00001d050805	-/-	2
	BP	GO:0022613	ribonucleoprotein complex biogenesis	3/170	91/10281	0.190711	0.64028	Zm00001d050515/Zm00001d050595/Zm00001d051116	-/-/-	3
	BP	GO:0010921	regulation of phosphatase activity	1/170	13/10281	0.194977	0.64028	Zm00001d051007	-	1
	BP	GO:0035303	regulation of dephosphorylation	1/170	13/10281	0.194977	0.64028	Zm00001d051007	-	1
	BP	GO:0035304	regulation of protein dephosphorylation	1/170	13/10281	0.194977	0.64028	Zm00001d051007	-	1
	BP	GO:0043666	regulation of phosphoprotein phosphatase activity	1/170	13/10281	0.194977	0.64028	Zm00001d051007	-	1
	BP	GO:0045786	negative regulation of cell cycle	1/170	13/10281	0.194977	0.64028	Zm00001d050944	-	1
	BP	GO:0000160	phosphorelay signal transduction system	2/170	51/10281	0.206206	0.64028	Zm00001d050768/Zm00001d051114	-/-	2
	BP	GO:0000956	nuclear-transcribed mRNA catabolic process	1/170	14/10281	0.208305	0.64028	Zm00001d051123	-	1
	BP	GO:0006402	mRNA catabolic process	1/170	14/10281	0.208305	0.64028	Zm00001d051123	-	1
	BP	GO:0015936	coenzyme A metabolic process	1/170	14/10281	0.208305	0.64028	Zm00001d050972	-	1
	BP	GO:0042221	response to chemical	4/170	144/10281	0.215307	0.64028	Zm00001d050507/Zm00001d050781/Zm00001d051127/Zm00001d051172	-/-/-/-	4
	BP	GO:0006470	protein dephosphorylation	1/170	15/10281	0.221414	0.64028	Zm00001d051007	-	1
	BP	GO:0048285	organelle fission	1/170	15/10281	0.221414	0.64028	Zm00001d050944	-	1
	BP	GO:0051336	regulation of hydrolase activity	1/170	15/10281	0.221414	0.64028	Zm00001d051007	-	1
	BP	GO:0061024	membrane organization	1/170	15/10281	0.221414	0.64028	Zm00001d051138	-	1
	BP	GO:0007165	signal transduction	5/170	196/10281	0.224204	0.64028	Zm00001d050422/Zm00001d050768/Zm00001d050984/Zm00001d051007/Zm00001d051114	-/-/-/-/-	5
	BP	GO:0023052	signaling	5/170	196/10281	0.224204	0.64028	Zm00001d050422/Zm00001d050768/Zm00001d050984/Zm00001d051007/Zm00001d051114	-/-/-/-/-	5
	BP	GO:0046488	phosphatidylinositol metabolic process	2/170	54/10281	0.224466	0.64028	Zm00001d051025/Zm00001d051136	-/-	2
	BP	GO:0006887	exocytosis	2/170	55/10281	0.230581	0.64028	Zm00001d050462/Zm00001d050972	-/-	2
	BP	GO:1901135	carbohydrate derivative metabolic process	7/170	302/10281	0.233394	0.64028	Zm00001d050251/Zm00001d050885/Zm00001d050961/Zm00001d050972/Zm00001d051025/Zm00001d051080/Zm00001d051136	-/-/-/-/-/-/-	7
	BP	GO:0006401	RNA catabolic process	1/170	16/10281	0.234307	0.64028	Zm00001d051123	-	1
	BP	GO:0032940	secretion by cell	2/170	56/10281	0.236707	0.64028	Zm00001d050462/Zm00001d050972	-/-	2
	BP	GO:0006996	organelle organization	10/170	468/10281	0.246611	0.64028	Zm00001d050244/Zm00001d050287/Zm00001d050368/Zm00001d050378/Zm00001d050503/Zm00001d050541/Zm00001d050627/Zm00001d050874/Zm00001d050944/Zm00001d051126	-/-/-/-/-/-/-/-/-/-	10
	BP	GO:0006766	vitamin metabolic process	1/170	17/10281	0.246988	0.64028	Zm00001d050844	-	1
	BP	GO:0006767	water-soluble vitamin metabolic process	1/170	17/10281	0.246988	0.64028	Zm00001d050844	-	1
	BP	GO:0006869	lipid transport	1/170	17/10281	0.246988	0.64028	Zm00001d051138	-	1
	BP	GO:0009110	vitamin biosynthetic process	1/170	17/10281	0.246988	0.64028	Zm00001d050844	-	1
	BP	GO:0009309	amine biosynthetic process	1/170	17/10281	0.246988	0.64028	Zm00001d051056	-	1
	BP	GO:0009966	regulation of signal transduction	1/170	17/10281	0.246988	0.64028	Zm00001d051007	-	1
	BP	GO:0010646	regulation of cell communication	1/170	17/10281	0.246988	0.64028	Zm00001d051007	-	1
	BP	GO:0016571	histone methylation	1/170	17/10281	0.246988	0.64028	Zm00001d051126	-	1
	BP	GO:0018022	peptidyl-lysine methylation	1/170	17/10281	0.246988	0.64028	Zm00001d051126	-	1
	BP	GO:0023051	regulation of signaling	1/170	17/10281	0.246988	0.64028	Zm00001d051007	-	1
	BP	GO:0031123	RNA 3'-end processing	1/170	17/10281	0.246988	0.64028	Zm00001d050266	-	1
	BP	GO:0033043	regulation of organelle organization	1/170	17/10281	0.246988	0.64028	Zm00001d050944	-	1
	BP	GO:0034968	histone lysine methylation	1/170	17/10281	0.246988	0.64028	Zm00001d051126	-	1
	BP	GO:0042364	water-soluble vitamin biosynthetic process	1/170	17/10281	0.246988	0.64028	Zm00001d050844	-	1
	BP	GO:0042401	cellular biogenic amine biosynthetic process	1/170	17/10281	0.246988	0.64028	Zm00001d051056	-	1
	BP	GO:0043631	RNA polyadenylation	1/170	17/10281	0.246988	0.64028	Zm00001d050266	-	1
	BP	GO:0043648	dicarboxylic acid metabolic process	1/170	17/10281	0.246988	0.64028	Zm00001d050412	-	1
	BP	GO:0006364	rRNA processing	2/170	59/10281	0.255132	0.64028	Zm00001d050515/Zm00001d050595	-/-	2
	BP	GO:0016072	rRNA metabolic process	2/170	59/10281	0.255132	0.64028	Zm00001d050515/Zm00001d050595	-/-	2
	BP	GO:0006074	(1->3)-beta-D-glucan metabolic process	1/170	18/10281	0.25946	0.64028	Zm00001d050344	-	1
	BP	GO:0006075	(1->3)-beta-D-glucan biosynthetic process	1/170	18/10281	0.25946	0.64028	Zm00001d050344	-	1
	BP	GO:0010876	lipid localization	1/170	18/10281	0.25946	0.64028	Zm00001d051138	-	1
	BP	GO:0006397	mRNA processing	2/170	61/10281	0.267434	0.64028	Zm00001d050266/Zm00001d050316	-/-	2
	BP	GO:0008654	phospholipid biosynthetic process	2/170	61/10281	0.267434	0.64028	Zm00001d051025/Zm00001d051136	-/-	2
	BP	GO:1901137	carbohydrate derivative biosynthetic process	5/170	210/10281	0.267448	0.64028	Zm00001d050251/Zm00001d050885/Zm00001d050961/Zm00001d051025/Zm00001d051136	-/-/-/-/-	5
	BP	GO:0015693	magnesium ion transport	1/170	19/10281	0.271726	0.64028	Zm00001d050604	-	1
	BP	GO:0070838	divalent metal ion transport	1/170	19/10281	0.271726	0.64028	Zm00001d050604	-	1
	BP	GO:0072511	divalent inorganic cation transport	1/170	19/10281	0.271726	0.64028	Zm00001d050604	-	1
	BP	GO:0015979	photosynthesis	2/170	63/10281	0.279735	0.64028	Zm00001d050889/Zm00001d051238	-/-	2
	BP	GO:0046903	secretion	2/170	63/10281	0.279735	0.64028	Zm00001d050462/Zm00001d050972	-/-	2
	BP	GO:0006479	protein methylation	1/170	20/10281	0.283791	0.64028	Zm00001d051126	-	1
	BP	GO:0008213	protein alkylation	1/170	20/10281	0.283791	0.64028	Zm00001d051126	-	1
	BP	GO:0019220	regulation of phosphate metabolic process	1/170	20/10281	0.283791	0.64028	Zm00001d051007	-	1
	BP	GO:0031399	regulation of protein modification process	1/170	20/10281	0.283791	0.64028	Zm00001d051007	-	1
	BP	GO:0051174	regulation of phosphorus metabolic process	1/170	20/10281	0.283791	0.64028	Zm00001d051007	-	1
	BP	GO:0006650	glycerophospholipid metabolic process	2/170	64/10281	0.285881	0.64028	Zm00001d051025/Zm00001d051136	-/-	2
	BP	GO:0048519	negative regulation of biological process	2/170	64/10281	0.285881	0.64028	Zm00001d050944/Zm00001d051123	-/-	2
	BP	GO:0044085	cellular component biogenesis	5/170	218/10281	0.292961	0.650758	Zm00001d050368/Zm00001d050515/Zm00001d050595/Zm00001d050874/Zm00001d051116	-/-/-/-/-	5
	BP	GO:0048583	regulation of response to stimulus	1/170	21/10281	0.295657	0.651406	Zm00001d051007	-	1
	BP	GO:0046486	glycerolipid metabolic process	2/170	66/10281	0.298157	0.651617	Zm00001d051025/Zm00001d051136	-/-	2
	BP	GO:0071103	DNA conformation change	2/170	67/10281	0.304283	0.655792	Zm00001d050368/Zm00001d050874	-/-	2
	BP	GO:0007034	vacuolar transport	1/170	22/10281	0.307327	0.655792	Zm00001d050978	-	1
	BP	GO:0051128	regulation of cellular component organization	1/170	22/10281	0.307327	0.655792	Zm00001d050944	-	1
	BP	GO:0022402	cell cycle process	1/170	23/10281	0.318805	0.67497	Zm00001d050944	-	1
	BP	GO:0018193	peptidyl-amino acid modification	2/170	73/10281	0.340796	0.711265	Zm00001d050635/Zm00001d051126	-/-	2
	BP	GO:0007264	small GTPase mediated signal transduction	1/170	25/10281	0.341197	0.711265	Zm00001d050984	-	1
	BP	GO:0018205	peptidyl-lysine modification	1/170	26/10281	0.352117	0.722908	Zm00001d051126	-	1
	BP	GO:0051726	regulation of cell cycle	1/170	26/10281	0.352117	0.722908	Zm00001d050944	-	1
	BP	GO:0016192	vesicle-mediated transport	5/170	239/10281	0.361534	0.73666	Zm00001d050352/Zm00001d050462/Zm00001d050823/Zm00001d050972/Zm00001d051009	-/-/-/-/-	5
	BP	GO:0034622	cellular protein-containing complex assembly	2/170	80/10281	0.382614	0.742946	Zm00001d050368/Zm00001d050874	-/-	2
	BP	GO:0033865	nucleoside bisphosphate metabolic process	1/170	29/10281	0.38381	0.742946	Zm00001d050972	-	1
	BP	GO:0033875	ribonucleoside bisphosphate metabolic process	1/170	29/10281	0.38381	0.742946	Zm00001d050972	-	1
	BP	GO:0034032	purine nucleoside bisphosphate metabolic process	1/170	29/10281	0.38381	0.742946	Zm00001d050972	-	1
	BP	GO:0043414	macromolecule methylation	1/170	29/10281	0.38381	0.742946	Zm00001d051126	-	1
	BP	GO:0050790	regulation of catalytic activity	1/170	29/10281	0.38381	0.742946	Zm00001d051007	-	1
	BP	GO:0065009	regulation of molecular function	1/170	29/10281	0.38381	0.742946	Zm00001d051007	-	1
	BP	GO:0042398	cellular modified amino acid biosynthetic process	1/170	30/10281	0.394027	0.757315	Zm00001d050448	-	1
	BP	GO:0001522	pseudouridine synthesis	1/170	32/10281	0.41396	0.789778	Zm00001d051116	-	1
	BP	GO:0065003	protein-containing complex assembly	2/170	86/10281	0.417547	0.789778	Zm00001d050368/Zm00001d050874	-/-	2
	BP	GO:0007154	cell communication	5/170	257/10281	0.420773	0.789778	Zm00001d050422/Zm00001d050768/Zm00001d050984/Zm00001d051007/Zm00001d051114	-/-/-/-/-	5
	BP	GO:0048523	negative regulation of cellular process	1/170	33/10281	0.423681	0.789778	Zm00001d050944	-	1
	BP	GO:0006576	cellular biogenic amine metabolic process	1/170	34/10281	0.433241	0.789778	Zm00001d051056	-	1
	BP	GO:0044106	cellular amine metabolic process	1/170	34/10281	0.433241	0.789778	Zm00001d051056	-	1
	BP	GO:0009056	catabolic process	6/170	320/10281	0.436191	0.789778	Zm00001d050393/Zm00001d050533/Zm00001d051021/Zm00001d051033/Zm00001d051123/Zm00001d051211	-/-/-/-/-/-	6
	BP	GO:0009116	nucleoside metabolic process	1/170	35/10281	0.442644	0.789778	Zm00001d051080	-	1
	BP	GO:0032268	regulation of cellular protein metabolic process	1/170	35/10281	0.442644	0.789778	Zm00001d051007	-	1
	BP	GO:1901657	glycosyl compound metabolic process	1/170	35/10281	0.442644	0.789778	Zm00001d051080	-	1
	BP	GO:0009733	response to auxin	2/170	91/10281	0.445889	0.789778	Zm00001d050507/Zm00001d051127	-/-	2
	BP	GO:0034470	ncRNA processing	2/170	91/10281	0.445889	0.789778	Zm00001d050515/Zm00001d050595	-/-	2
	BP	GO:0005992	trehalose biosynthetic process	1/170	36/10281	0.451891	0.795212	Zm00001d050293	-	1
	BP	GO:0005991	trehalose metabolic process	1/170	37/10281	0.460986	0.800816	Zm00001d050293	-	1
	BP	GO:0051246	regulation of protein metabolic process	1/170	37/10281	0.460986	0.800816	Zm00001d051007	-	1
	BP	GO:0032259	methylation	1/170	38/10281	0.469931	0.811156	Zm00001d051126	-	1
	BP	GO:0046351	disaccharide biosynthetic process	1/170	39/10281	0.478729	0.816519	Zm00001d050293	-	1
	BP	GO:0044248	cellular catabolic process	5/170	275/10281	0.479065	0.816519	Zm00001d050533/Zm00001d051021/Zm00001d051033/Zm00001d051123/Zm00001d051211	-/-/-/-/-	5
	BP	GO:0006644	phospholipid metabolic process	2/170	99/10281	0.489594	0.81697	Zm00001d051025/Zm00001d051136	-/-	2
	BP	GO:0007049	cell cycle	1/170	41/10281	0.495891	0.81697	Zm00001d050944	-	1
	BP	GO:0006396	RNA processing	4/170	221/10281	0.49889	0.81697	Zm00001d050266/Zm00001d050316/Zm00001d050515/Zm00001d050595	-/-/-/-	4
	BP	GO:0034655	nucleobase-containing compound catabolic process	2/170	101/10281	0.500183	0.81697	Zm00001d050533/Zm00001d051123	-/-	2
	BP	GO:0071804	cellular potassium ion transport	1/170	42/10281	0.50426	0.81697	Zm00001d050937	-	1
	BP	GO:0071805	potassium ion transmembrane transport	1/170	42/10281	0.50426	0.81697	Zm00001d050937	-	1
	BP	GO:0000413	protein peptidyl-prolyl isomerization	1/170	43/10281	0.51249	0.81697	Zm00001d050635	-	1
	BP	GO:0009312	oligosaccharide biosynthetic process	1/170	43/10281	0.51249	0.81697	Zm00001d050293	-	1
	BP	GO:0010629	negative regulation of gene expression	1/170	43/10281	0.51249	0.81697	Zm00001d051123	-	1
	BP	GO:0016311	dephosphorylation	1/170	43/10281	0.51249	0.81697	Zm00001d051007	-	1
	BP	GO:0018208	peptidyl-proline modification	1/170	43/10281	0.51249	0.81697	Zm00001d050635	-	1
	BP	GO:0006813	potassium ion transport	1/170	45/10281	0.528547	0.82121	Zm00001d050937	-	1
	BP	GO:0009892	negative regulation of metabolic process	1/170	45/10281	0.528547	0.82121	Zm00001d051123	-	1
	BP	GO:0010605	negative regulation of macromolecule metabolic process	1/170	45/10281	0.528547	0.82121	Zm00001d051123	-	1
	BP	GO:0000723	telomere maintenance	5/170	293/10281	0.535333	0.82121	Zm00001d050287/Zm00001d050378/Zm00001d050503/Zm00001d050541/Zm00001d050627	-/-/-/-/-	5
	BP	GO:0032200	telomere organization	5/170	293/10281	0.535333	0.82121	Zm00001d050287/Zm00001d050378/Zm00001d050503/Zm00001d050541/Zm00001d050627	-/-/-/-/-	5
	BP	GO:0060249	anatomical structure homeostasis	5/170	293/10281	0.535333	0.82121	Zm00001d050287/Zm00001d050378/Zm00001d050503/Zm00001d050541/Zm00001d050627	-/-/-/-/-	5
	BP	GO:0009057	macromolecule catabolic process	3/170	170/10281	0.536362	0.82121	Zm00001d050393/Zm00001d051123/Zm00001d051211	-/-/-	3
	BP	GO:0034637	cellular carbohydrate biosynthetic process	2/170	111/10281	0.550973	0.838841	Zm00001d050293/Zm00001d050344	-/-	2
	BP	GO:0043933	protein-containing complex subunit organization	2/170	113/10281	0.56069	0.845453	Zm00001d050368/Zm00001d050874	-/-	2
	BP	GO:0030163	protein catabolic process	2/170	114/10281	0.565492	0.845453	Zm00001d050393/Zm00001d051211	-/-	2
	BP	GO:0046700	heterocycle catabolic process	2/170	115/10281	0.570256	0.845453	Zm00001d050533/Zm00001d051123	-/-	2
	BP	GO:0019439	aromatic compound catabolic process	2/170	116/10281	0.574983	0.845453	Zm00001d050533/Zm00001d051123	-/-	2
	BP	GO:0044270	cellular nitrogen compound catabolic process	2/170	116/10281	0.574983	0.845453	Zm00001d050533/Zm00001d051123	-/-	2
	BP	GO:1901361	organic cyclic compound catabolic process	2/170	116/10281	0.574983	0.845453	Zm00001d050533/Zm00001d051123	-/-	2
	BP	GO:0042592	homeostatic process	5/170	307/10281	0.577154	0.845453	Zm00001d050287/Zm00001d050378/Zm00001d050503/Zm00001d050541/Zm00001d050627	-/-/-/-/-	5
	BP	GO:0006811	ion transport	7/170	434/10281	0.581313	0.846801	Zm00001d050283/Zm00001d050335/Zm00001d050509/Zm00001d050604/Zm00001d050937/Zm00001d051050/Zm00001d051103	-/-/-/-/-/-/-	7
	BP	GO:0022607	cellular component assembly	2/170	118/10281	0.584324	0.846801	Zm00001d050368/Zm00001d050874	-/-	2
	BP	GO:0009451	RNA modification	1/170	54/10281	0.594536	0.857017	Zm00001d051116	-	1
	BP	GO:0009308	amine metabolic process	1/170	55/10281	0.601276	0.862146	Zm00001d051056	-	1
	BP	GO:0006281	DNA repair	6/170	387/10281	0.621855	0.885989	Zm00001d050287/Zm00001d050378/Zm00001d050503/Zm00001d050541/Zm00001d050627/Zm00001d050929	-/-/-/-/-/-	6
	BP	GO:0016051	carbohydrate biosynthetic process	2/170	127/10281	0.624486	0.885989	Zm00001d050293/Zm00001d050344	-/-	2
	BP	GO:0006974	cellular response to DNA damage stimulus	6/170	392/10281	0.634321	0.885989	Zm00001d050287/Zm00001d050378/Zm00001d050503/Zm00001d050541/Zm00001d050627/Zm00001d050929	-/-/-/-/-/-	6
	BP	GO:0033554	cellular response to stress	6/170	393/10281	0.636785	0.885989	Zm00001d050287/Zm00001d050378/Zm00001d050503/Zm00001d050541/Zm00001d050627/Zm00001d050929	-/-/-/-/-/-	6
	BP	GO:0044265	cellular macromolecule catabolic process	2/170	130/10281	0.637193	0.885989	Zm00001d051123/Zm00001d051211	-/-	2
	BP	GO:0006732	coenzyme metabolic process	2/170	131/10281	0.641354	0.885989	Zm00001d050448/Zm00001d050972	-/-	2
	BP	GO:0000271	polysaccharide biosynthetic process	1/170	64/10281	0.657136	0.885989	Zm00001d050344	-	1
	BP	GO:0005984	disaccharide metabolic process	1/170	64/10281	0.657136	0.885989	Zm00001d050293	-	1
	BP	GO:0009250	glucan biosynthetic process	1/170	64/10281	0.657136	0.885989	Zm00001d050344	-	1
	BP	GO:0033692	cellular polysaccharide biosynthetic process	1/170	64/10281	0.657136	0.885989	Zm00001d050344	-	1
	BP	GO:0051273	beta-glucan metabolic process	1/170	64/10281	0.657136	0.885989	Zm00001d050344	-	1
	BP	GO:0051274	beta-glucan biosynthetic process	1/170	64/10281	0.657136	0.885989	Zm00001d050344	-	1
	BP	GO:0009311	oligosaccharide metabolic process	1/170	68/10281	0.679395	0.910811	Zm00001d050293	-	1
	BP	GO:0044255	cellular lipid metabolic process	3/170	211/10281	0.682268	0.910811	Zm00001d050552/Zm00001d051025/Zm00001d051136	-/-/-	3
	BP	GO:0065008	regulation of biological quality	5/170	350/10281	0.692038	0.919326	Zm00001d050287/Zm00001d050378/Zm00001d050503/Zm00001d050541/Zm00001d050627	-/-/-/-/-	5
	BP	GO:0071702	organic substance transport	4/170	286/10281	0.700904	0.926561	Zm00001d050526/Zm00001d050851/Zm00001d051014/Zm00001d051138	-/-/-/-	4
	BP	GO:0006631	fatty acid metabolic process	1/170	73/10281	0.70521	0.927727	Zm00001d050552	-	1
	BP	GO:0055086	nucleobase-containing small molecule metabolic process	3/170	220/10281	0.709331	0.928641	Zm00001d050533/Zm00001d050972/Zm00001d051080	-/-/-	3
	BP	GO:1901292	nucleoside phosphate catabolic process	1/170	79/10281	0.733473	0.95563	Zm00001d050533	-	1
	BP	GO:0034404	nucleobase-containing small molecule biosynthetic process	1/170	80/10281	0.737914	0.956817	Zm00001d050533	-	1
	BP	GO:0006511	ubiquitin-dependent protein catabolic process	1/170	84/10281	0.754955	0.9582	Zm00001d051211	-	1
	BP	GO:0019941	modification-dependent protein catabolic process	1/170	84/10281	0.754955	0.9582	Zm00001d051211	-	1
	BP	GO:0043632	modification-dependent macromolecule catabolic process	1/170	84/10281	0.754955	0.9582	Zm00001d051211	-	1
	BP	GO:1901565	organonitrogen compound catabolic process	2/170	163/10281	0.755495	0.9582	Zm00001d050393/Zm00001d051211	-/-	2
	BP	GO:1901575	organic substance catabolic process	4/170	309/10281	0.756659	0.9582	Zm00001d050393/Zm00001d050533/Zm00001d051123/Zm00001d051211	-/-/-/-	4
	BP	GO:0019637	organophosphate metabolic process	4/170	318/10281	0.776191	0.966786	Zm00001d050533/Zm00001d050972/Zm00001d051025/Zm00001d051136	-/-/-/-	4
	BP	GO:0046434	organophosphate catabolic process	1/170	91/10281	0.782169	0.966786	Zm00001d050533	-	1
	BP	GO:0034660	ncRNA metabolic process	2/170	173/10281	0.784142	0.966786	Zm00001d050515/Zm00001d050595	-/-	2
	BP	GO:0006812	cation transport	4/170	323/10281	0.786502	0.966786	Zm00001d050335/Zm00001d050509/Zm00001d050604/Zm00001d050937	-/-/-/-	4
	BP	GO:0006259	DNA metabolic process	6/170	469/10281	0.793988	0.966786	Zm00001d050287/Zm00001d050378/Zm00001d050503/Zm00001d050541/Zm00001d050627/Zm00001d050929	-/-/-/-/-/-	6
	BP	GO:0044262	cellular carbohydrate metabolic process	2/170	178/10281	0.797337	0.966786	Zm00001d050293/Zm00001d050344	-/-	2
	BP	GO:0006073	cellular glucan metabolic process	1/170	96/10281	0.799746	0.966786	Zm00001d050344	-	1
	BP	GO:0044042	glucan metabolic process	1/170	96/10281	0.799746	0.966786	Zm00001d050344	-	1
	BP	GO:0044264	cellular polysaccharide metabolic process	1/170	96/10281	0.799746	0.966786	Zm00001d050344	-	1
	BP	GO:0017144	drug metabolic process	2/170	179/10281	0.799889	0.966786	Zm00001d050844/Zm00001d051056	-/-	2
	BP	GO:0006457	protein folding	1/170	97/10281	0.803089	0.966786	Zm00001d051062	-	1
	BP	GO:0007017	microtubule-based process	1/170	99/10281	0.809608	0.966786	Zm00001d050905	-	1
	BP	GO:0008610	lipid biosynthetic process	2/170	183/10281	0.809817	0.966786	Zm00001d051025/Zm00001d051136	-/-	2
	BP	GO:0044283	small molecule biosynthetic process	3/170	265/10281	0.818769	0.971646	Zm00001d050448/Zm00001d050533/Zm00001d050844	-/-/-	3
	BP	GO:0030001	metal ion transport	2/170	189/10281	0.823891	0.971646	Zm00001d050604/Zm00001d050937	-/-	2
	BP	GO:0071705	nitrogen compound transport	3/170	268/10281	0.824644	0.971646	Zm00001d050526/Zm00001d050851/Zm00001d051014	-/-/-	3
	BP	GO:0009108	coenzyme biosynthetic process	1/170	108/10281	0.836389	0.974919	Zm00001d050448	-	1
	BP	GO:0006753	nucleoside phosphate metabolic process	2/170	196/10281	0.83913	0.974919	Zm00001d050533/Zm00001d050972	-/-	2
	BP	GO:0044257	cellular protein catabolic process	1/170	110/10281	0.841812	0.974919	Zm00001d051211	-	1
	BP	GO:0051603	proteolysis involved in cellular protein catabolic process	1/170	110/10281	0.841812	0.974919	Zm00001d051211	-	1
	BP	GO:0005976	polysaccharide metabolic process	1/170	113/10281	0.849613	0.979766	Zm00001d050344	-	1
	BP	GO:0009141	nucleoside triphosphate metabolic process	1/170	116/10281	0.857031	0.983717	Zm00001d050533	-	1
	BP	GO:0015672	monovalent inorganic cation transport	1/170	123/10281	0.872956	0.983717	Zm00001d050937	-	1
	BP	GO:0006575	cellular modified amino acid metabolic process	1/170	124/10281	0.875082	0.983717	Zm00001d050448	-	1
	BP	GO:0090407	organophosphate biosynthetic process	2/170	217/10281	0.877973	0.983717	Zm00001d051025/Zm00001d051136	-/-	2
	BP	GO:0098655	cation transmembrane transport	1/170	130/10281	0.887116	0.983717	Zm00001d050937	-	1
	BP	GO:0098660	inorganic ion transmembrane transport	1/170	130/10281	0.887116	0.983717	Zm00001d050937	-	1
	BP	GO:0098662	inorganic cation transmembrane transport	1/170	130/10281	0.887116	0.983717	Zm00001d050937	-	1
	BP	GO:0051188	cofactor biosynthetic process	1/170	134/10281	0.894491	0.983717	Zm00001d050448	-	1
	BP	GO:0034220	ion transmembrane transport	1/170	138/10281	0.901387	0.983717	Zm00001d050937	-	1
	BP	GO:0009150	purine ribonucleotide metabolic process	1/170	146/10281	0.913863	0.983717	Zm00001d050972	-	1
	BP	GO:0009259	ribonucleotide metabolic process	1/170	146/10281	0.913863	0.983717	Zm00001d050972	-	1
	BP	GO:0019752	carboxylic acid metabolic process	4/170	412/10281	0.914169	0.983717	Zm00001d050412/Zm00001d050448/Zm00001d050552/Zm00001d050694	-/-/-/-	4
	BP	GO:0043436	oxoacid metabolic process	4/170	412/10281	0.914169	0.983717	Zm00001d050412/Zm00001d050448/Zm00001d050552/Zm00001d050694	-/-/-/-	4
	BP	GO:0006082	organic acid metabolic process	4/170	413/10281	0.915102	0.983717	Zm00001d050412/Zm00001d050448/Zm00001d050552/Zm00001d050694	-/-/-/-	4
	BP	GO:0006163	purine nucleotide metabolic process	1/170	150/10281	0.9195	0.983717	Zm00001d050972	-	1
	BP	GO:0019693	ribose phosphate metabolic process	1/170	152/10281	0.922179	0.983717	Zm00001d050972	-	1
	BP	GO:0072521	purine-containing compound metabolic process	1/170	152/10281	0.922179	0.983717	Zm00001d050972	-	1
	BP	GO:0032787	monocarboxylic acid metabolic process	1/170	157/10281	0.928495	0.983717	Zm00001d050552	-	1
	BP	GO:0006629	lipid metabolic process	4/170	432/10281	0.931197	0.983717	Zm00001d050552/Zm00001d050917/Zm00001d051025/Zm00001d051136	-/-/-/-	4
	BP	GO:0033036	macromolecule localization	2/170	262/10281	0.933905	0.983717	Zm00001d050526/Zm00001d051138	-/-	2
	BP	GO:0006886	intracellular protein transport	1/170	169/10281	0.941651	0.983717	Zm00001d050526	-	1
	BP	GO:0051186	cofactor metabolic process	2/170	272/10281	0.942517	0.983717	Zm00001d050448/Zm00001d050972	-/-	2
	BP	GO:0034613	cellular protein localization	1/170	181/10281	0.952398	0.983717	Zm00001d050526	-	1
	BP	GO:0070727	cellular macromolecule localization	1/170	181/10281	0.952398	0.983717	Zm00001d050526	-	1
	BP	GO:0006979	response to oxidative stress	1/170	183/10281	0.953987	0.983717	Zm00001d050572	-	1
	BP	GO:0009117	nucleotide metabolic process	1/170	185/10281	0.955523	0.983717	Zm00001d050972	-	1
	BP	GO:0046907	intracellular transport	1/170	194/10281	0.961829	0.983717	Zm00001d050526	-	1
	BP	GO:0051649	establishment of localization in cell	1/170	195/10281	0.962473	0.983717	Zm00001d050526	-	1
	BP	GO:0016053	organic acid biosynthetic process	1/170	213/10281	0.972372	0.983717	Zm00001d050448	-	1
	BP	GO:0046394	carboxylic acid biosynthetic process	1/170	213/10281	0.972372	0.983717	Zm00001d050448	-	1
	BP	GO:0051641	cellular localization	1/170	222/10281	0.976299	0.983717	Zm00001d050526	-	1
	BP	GO:0015031	protein transport	1/170	232/10281	0.980015	0.983717	Zm00001d050526	-	1
	BP	GO:0015833	peptide transport	1/170	232/10281	0.980015	0.983717	Zm00001d050526	-	1
	BP	GO:0042886	amide transport	1/170	232/10281	0.980015	0.983717	Zm00001d050526	-	1
	BP	GO:0045184	establishment of protein localization	1/170	235/10281	0.981012	0.983717	Zm00001d050526	-	1
	BP	GO:0008104	protein localization	1/170	244/10281	0.983717	0.983717	Zm00001d050526	-	1
	CC	GO:0000139	Golgi membrane	2/59	13/3272	0.0219479	0.669578	Zm00001d050851/Zm00001d051014	-/-	2
	CC	GO:0098791	Golgi subcompartment	2/59	14/3272	0.0253125	0.669578	Zm00001d050851/Zm00001d051014	-/-	2
	CC	GO:0031984	organelle subcompartment	3/59	50/3272	0.0600554	0.669578	Zm00001d050851/Zm00001d051014/Zm00001d051025	-/-/-	3
	CC	GO:1902494	catalytic complex	7/59	223/3272	0.103515	0.669578	Zm00001d050344/Zm00001d050529/Zm00001d050889/Zm00001d050905/Zm00001d050944/Zm00001d051025/Zm00001d051211	-/-/-/-/-/-/-	7
	CC	GO:0005794	Golgi apparatus	2/59	39/3272	0.155307	0.669578	Zm00001d050851/Zm00001d051014	-/-	2
	CC	GO:0044431	Golgi apparatus part	2/59	39/3272	0.155307	0.669578	Zm00001d050851/Zm00001d051014	-/-	2
	CC	GO:0000151	ubiquitin ligase complex	1/59	10/3272	0.166579	0.669578	Zm00001d050944	-	1
	CC	GO:0030286	dynein complex	1/59	10/3272	0.166579	0.669578	Zm00001d050905	-	1
	CC	GO:0098803	respiratory chain complex	1/59	10/3272	0.166579	0.669578	Zm00001d051055	-	1
	CC	GO:0070461	SAGA-type complex	1/59	11/3272	0.181653	0.669578	Zm00001d050529	-	1
	CC	GO:0070469	respiratory chain	1/59	11/3272	0.181653	0.669578	Zm00001d051055	-	1
	CC	GO:0005634	nucleus	11/59	454/3272	0.186516	0.669578	Zm00001d050266/Zm00001d050315/Zm00001d050388/Zm00001d050529/Zm00001d050781/Zm00001d050861/Zm00001d050874/Zm00001d050897/Zm00001d050944/Zm00001d051126/Zm00001d051172	-/-/-/-/-/-/-/-/-/-/-	11
	CC	GO:0000145	exocyst	2/59	45/3272	0.194161	0.669578	Zm00001d050462/Zm00001d050972	-/-	2
	CC	GO:0005938	cell cortex	2/59	45/3272	0.194161	0.669578	Zm00001d050462/Zm00001d050972	-/-	2
	CC	GO:0044448	cell cortex part	2/59	45/3272	0.194161	0.669578	Zm00001d050462/Zm00001d050972	-/-	2
	CC	GO:0099568	cytoplasmic region	2/59	45/3272	0.194161	0.669578	Zm00001d050462/Zm00001d050972	-/-	2
	CC	GO:0000123	histone acetyltransferase complex	1/59	12/3272	0.196459	0.669578	Zm00001d050529	-	1
	CC	GO:0032040	small-subunit processome	1/59	12/3272	0.196459	0.669578	Zm00001d050595	-	1
	CC	GO:0070069	cytochrome complex	1/59	12/3272	0.196459	0.669578	Zm00001d051055	-	1
	CC	GO:0031248	protein acetyltransferase complex	1/59	13/3272	0.211002	0.669578	Zm00001d050529	-	1
	CC	GO:1902493	acetyltransferase complex	1/59	13/3272	0.211002	0.669578	Zm00001d050529	-	1
	CC	GO:0005875	microtubule associated complex	1/59	14/3272	0.225286	0.669578	Zm00001d050905	-	1
	CC	GO:1990234	transferase complex	3/59	93/3272	0.23459	0.669578	Zm00001d050344/Zm00001d050529/Zm00001d050944	-/-/-	3
	CC	GO:0015630	microtubule cytoskeleton	1/59	16/3272	0.253095	0.669578	Zm00001d050905	-	1
	CC	GO:0030684	preribosome	1/59	16/3272	0.253095	0.669578	Zm00001d050595	-	1
	CC	GO:0099023	tethering complex	2/59	56/3272	0.267826	0.669578	Zm00001d050462/Zm00001d050972	-/-	2
	CC	GO:0000148	1,3-beta-D-glucan synthase complex	1/59	18/3272	0.279922	0.669578	Zm00001d050344	-	1
	CC	GO:0019773	proteasome core complex, alpha-subunit complex	1/59	18/3272	0.279922	0.669578	Zm00001d051211	-	1
	CC	GO:0005654	nucleoplasm	2/59	61/3272	0.30155	0.669578	Zm00001d050266/Zm00001d050529	-/-	2
	CC	GO:0044451	nucleoplasm part	2/59	61/3272	0.30155	0.669578	Zm00001d050266/Zm00001d050529	-/-	2
	CC	GO:0000786	nucleosome	1/59	21/3272	0.318396	0.669578	Zm00001d050368	-	1
	CC	GO:0019898	extrinsic component of membrane	1/59	21/3272	0.318396	0.669578	Zm00001d050889	-	1
	CC	GO:0071944	cell periphery	3/59	110/3272	0.31862	0.669578	Zm00001d050344/Zm00001d050462/Zm00001d050972	-/-/-	3
	CC	GO:0044815	DNA packaging complex	1/59	22/3272	0.330766	0.669578	Zm00001d050368	-	1
	CC	GO:0000785	chromatin	1/59	24/3272	0.354848	0.669578	Zm00001d050368	-	1
	CC	GO:0032993	protein-DNA complex	1/59	24/3272	0.354848	0.669578	Zm00001d050368	-	1
	CC	GO:0098797	plasma membrane protein complex	1/59	25/3272	0.366567	0.669578	Zm00001d050344	-	1
	CC	GO:0044422	organelle part	8/59	385/3272	0.39167	0.669578	Zm00001d050266/Zm00001d050368/Zm00001d050529/Zm00001d050851/Zm00001d050905/Zm00001d050944/Zm00001d051014/Zm00001d051025	-/-/-/-/-/-/-/-	8
	CC	GO:0044446	intracellular organelle part	8/59	385/3272	0.39167	0.669578	Zm00001d050266/Zm00001d050368/Zm00001d050529/Zm00001d050851/Zm00001d050905/Zm00001d050944/Zm00001d051014/Zm00001d051025	-/-/-/-/-/-/-/-	8
	CC	GO:0009654	photosystem II oxygen evolving complex	1/59	28/3272	0.400483	0.669578	Zm00001d050889	-	1
	CC	GO:0042651	thylakoid membrane	1/59	28/3272	0.400483	0.669578	Zm00001d050889	-	1
	CC	GO:0098588	bounding membrane of organelle	2/59	77/3272	0.406934	0.669578	Zm00001d050851/Zm00001d051014	-/-	2
	CC	GO:0044428	nuclear part	3/59	130/3272	0.418198	0.669578	Zm00001d050266/Zm00001d050529/Zm00001d050944	-/-/-	3
	CC	GO:0031981	nuclear lumen	2/59	79/3272	0.419639	0.669578	Zm00001d050266/Zm00001d050529	-/-	2
	CC	GO:0044459	plasma membrane part	1/59	30/3272	0.422095	0.669578	Zm00001d050344	-	1
	CC	GO:0012505	endomembrane system	3/59	133/3272	0.432844	0.669578	Zm00001d050851/Zm00001d051014/Zm00001d051025	-/-/-	3
	CC	GO:0005886	plasma membrane	1/59	33/3272	0.453085	0.669578	Zm00001d050344	-	1
	CC	GO:1990204	oxidoreductase complex	1/59	33/3272	0.453085	0.669578	Zm00001d050889	-	1
	CC	GO:0009523	photosystem II	1/59	35/3272	0.472831	0.669578	Zm00001d050889	-	1
	CC	GO:0005789	endoplasmic reticulum membrane	1/59	36/3272	0.48244	0.669578	Zm00001d051025	-	1
	CC	GO:0042175	nuclear outer membrane-endoplasmic reticulum membrane network	1/59	36/3272	0.48244	0.669578	Zm00001d051025	-	1
	CC	GO:0044432	endoplasmic reticulum part	1/59	36/3272	0.48244	0.669578	Zm00001d051025	-	1
	CC	GO:0098827	endoplasmic reticulum subcompartment	1/59	36/3272	0.48244	0.669578	Zm00001d051025	-	1
	CC	GO:0031974	membrane-enclosed lumen	2/59	90/3272	0.486966	0.669578	Zm00001d050266/Zm00001d050529	-/-	2
	CC	GO:0043233	organelle lumen	2/59	90/3272	0.486966	0.669578	Zm00001d050266/Zm00001d050529	-/-	2
	CC	GO:0070013	intracellular organelle lumen	2/59	90/3272	0.486966	0.669578	Zm00001d050266/Zm00001d050529	-/-	2
	CC	GO:0005667	transcription factor complex	1/59	43/3272	0.545044	0.691812	Zm00001d050664	-	1
	CC	GO:0005839	proteasome core complex	1/59	44/3272	0.553357	0.691812	Zm00001d051211	-	1
	CC	GO:0031090	organelle membrane	2/59	102/3272	0.554809	0.691812	Zm00001d050851/Zm00001d051014	-/-	2
	CC	GO:0098796	membrane protein complex	4/59	221/3272	0.57207	0.691812	Zm00001d050344/Zm00001d050889/Zm00001d051025/Zm00001d051055	-/-/-/-	4
	CC	GO:0044430	cytoskeletal part	1/59	47/3272	0.57741	0.691812	Zm00001d050905	-	1
	CC	GO:0000502	proteasome complex	1/59	48/3272	0.585141	0.691812	Zm00001d051211	-	1
	CC	GO:1905369	endopeptidase complex	1/59	48/3272	0.585141	0.691812	Zm00001d051211	-	1
	CC	GO:0005856	cytoskeleton	1/59	49/3272	0.592733	0.691812	Zm00001d050905	-	1
	CC	GO:0044427	chromosomal part	1/59	50/3272	0.600189	0.691812	Zm00001d050368	-	1
	CC	GO:0009521	photosystem	1/59	53/3272	0.621759	0.691812	Zm00001d050889	-	1
	CC	GO:0034357	photosynthetic membrane	1/59	53/3272	0.621759	0.691812	Zm00001d050889	-	1
	CC	GO:0009579	thylakoid	1/59	55/3272	0.635499	0.691812	Zm00001d050889	-	1
	CC	GO:0044436	thylakoid part	1/59	55/3272	0.635499	0.691812	Zm00001d050889	-	1
	CC	GO:1905368	peptidase complex	1/59	58/3272	0.655195	0.691812	Zm00001d051211	-	1
	CC	GO:0005840	ribosome	6/59	364/3272	0.655416	0.691812	Zm00001d050411/Zm00001d050496/Zm00001d050532/Zm00001d050675/Zm00001d050920/Zm00001d050921	-/-/-/-/-/-	6
	CC	GO:1990904	ribonucleoprotein complex	7/59	424/3272	0.658665	0.691812	Zm00001d050411/Zm00001d050496/Zm00001d050532/Zm00001d050595/Zm00001d050675/Zm00001d050920/Zm00001d050921	-/-/-/-/-/-/-	7
	CC	GO:0043228	non-membrane-bounded organelle	8/59	488/3272	0.672025	0.691812	Zm00001d050368/Zm00001d050411/Zm00001d050496/Zm00001d050532/Zm00001d050675/Zm00001d050905/Zm00001d050920/Zm00001d050921	-/-/-/-/-/-/-/-	8
	CC	GO:0043232	intracellular non-membrane-bounded organelle	8/59	488/3272	0.672025	0.691812	Zm00001d050368/Zm00001d050411/Zm00001d050496/Zm00001d050532/Zm00001d050675/Zm00001d050905/Zm00001d050920/Zm00001d050921	-/-/-/-/-/-/-/-	8
	CC	GO:0005783	endoplasmic reticulum	1/59	61/3272	0.673843	0.691812	Zm00001d051025	-	1
	CC	GO:0005694	chromosome	1/59	63/3272	0.685721	0.694743	Zm00001d050368	-	1
	CC	GO:0005739	mitochondrion	1/59	67/3272	0.708214	0.708214	Zm00001d051055	-	1
	MF	GO:0140103	catalytic activity, acting on a glycoprotein	3/239	16/15556	0.00172967	0.290584	Zm00001d050645/Zm00001d050716/Zm00001d050961	-/-/-	3
	MF	GO:0005338	nucleotide-sugar transmembrane transporter activity	2/239	10/15556	0.00975216	0.379138	Zm00001d050851/Zm00001d051014	-/-	2
	MF	GO:0015165	pyrimidine nucleotide-sugar transmembrane transporter activity	2/239	10/15556	0.00975216	0.379138	Zm00001d050851/Zm00001d051014	-/-	2
	MF	GO:0033926	glycopeptide alpha-N-acetylgalactosaminidase activity	2/239	11/15556	0.0117994	0.379138	Zm00001d050645/Zm00001d050716	-/-	2
	MF	GO:0015103	inorganic anion transmembrane transporter activity	3/239	35/15556	0.0163225	0.379138	Zm00001d050283/Zm00001d051050/Zm00001d051103	-/-/-	3
	MF	GO:0008509	anion transmembrane transporter activity	3/239	40/15556	0.0233033	0.379138	Zm00001d050283/Zm00001d051050/Zm00001d051103	-/-/-	3
	MF	GO:0005244	voltage-gated ion channel activity	2/239	18/15556	0.0305928	0.379138	Zm00001d051050/Zm00001d051103	-/-	2
	MF	GO:0005247	voltage-gated chloride channel activity	2/239	18/15556	0.0305928	0.379138	Zm00001d051050/Zm00001d051103	-/-	2
	MF	GO:0005253	anion channel activity	2/239	18/15556	0.0305928	0.379138	Zm00001d051050/Zm00001d051103	-/-	2
	MF	GO:0005254	chloride channel activity	2/239	18/15556	0.0305928	0.379138	Zm00001d051050/Zm00001d051103	-/-	2
	MF	GO:0008308	voltage-gated anion channel activity	2/239	18/15556	0.0305928	0.379138	Zm00001d051050/Zm00001d051103	-/-	2
	MF	GO:0015108	chloride transmembrane transporter activity	2/239	18/15556	0.0305928	0.379138	Zm00001d051050/Zm00001d051103	-/-	2
	MF	GO:0022832	voltage-gated channel activity	2/239	18/15556	0.0305928	0.379138	Zm00001d051050/Zm00001d051103	-/-	2
	MF	GO:0015932	nucleobase-containing compound transmembrane transporter activity	2/239	19/15556	0.0338516	0.379138	Zm00001d050851/Zm00001d051014	-/-	2
	MF	GO:1901505	carbohydrate derivative transmembrane transporter activity	2/239	19/15556	0.0338516	0.379138	Zm00001d050851/Zm00001d051014	-/-	2
	MF	GO:0016614	oxidoreductase activity, acting on CH-OH group of donors	5/239	136/15556	0.0588122	0.617528	Zm00001d050409/Zm00001d050965/Zm00001d050967/Zm00001d050972/Zm00001d051130	-/-/-/-/-	5
	MF	GO:0003682	chromatin binding	2/239	27/15556	0.0641711	0.634161	Zm00001d050330/Zm00001d050382	-/-	2
	MF	GO:0060589	nucleoside-triphosphatase regulator activity	3/239	71/15556	0.0959062	0.736397	Zm00001d050984/Zm00001d051062/Zm00001d051187	-/-/-	3
	MF	GO:0022836	gated channel activity	2/239	35/15556	0.100547	0.736397	Zm00001d051050/Zm00001d051103	-/-	2
	MF	GO:0022839	ion gated channel activity	2/239	35/15556	0.100547	0.736397	Zm00001d051050/Zm00001d051103	-/-	2
	MF	GO:0016616	oxidoreductase activity, acting on the CH-OH group of donors, NAD or NADP as acceptor	4/239	115/15556	0.101207	0.736397	Zm00001d050409/Zm00001d050965/Zm00001d050967/Zm00001d050972	-/-/-/-	4
	MF	GO:0016830	carbon-carbon lyase activity	3/239	74/15556	0.105301	0.736397	Zm00001d050694/Zm00001d050844/Zm00001d051056	-/-/-	3
	MF	GO:0042578	phosphoric ester hydrolase activity	7/239	260/15556	0.106728	0.736397	Zm00001d050415/Zm00001d050614/Zm00001d050737/Zm00001d050917/Zm00001d051199/Zm00001d051200/Zm00001d051202	-/-/-/-/-/-/-	7
	MF	GO:0003690	double-stranded DNA binding	2/239	42/15556	0.135912	0.736397	Zm00001d050886/Zm00001d050929	-/-	2
	MF	GO:0005319	lipid transporter activity	1/239	11/15556	0.156647	0.736397	Zm00001d051138	-	1
	MF	GO:0005544	calcium-dependent phospholipid binding	1/239	11/15556	0.156647	0.736397	Zm00001d050346	-	1
	MF	GO:0030976	thiamine pyrophosphate binding	1/239	11/15556	0.156647	0.736397	Zm00001d050567	-	1
	MF	GO:0060590	ATPase regulator activity	1/239	11/15556	0.156647	0.736397	Zm00001d051062	-	1
	MF	GO:0030983	mismatched DNA binding	1/239	12/15556	0.169613	0.736397	Zm00001d050929	-	1
	MF	GO:0045300	acyl-[acyl-carrier-protein] desaturase activity	1/239	13/15556	0.182381	0.736397	Zm00001d050552	-	1
	MF	GO:0047429	nucleoside-triphosphate diphosphatase activity	1/239	14/15556	0.194953	0.736397	Zm00001d050533	-	1
	MF	GO:0050661	NADP binding	2/239	54/15556	0.201296	0.736397	Zm00001d050326/Zm00001d050810	-/-	2
	MF	GO:0016831	carboxy-lyase activity	2/239	55/15556	0.206914	0.736397	Zm00001d050694/Zm00001d051056	-/-	2
	MF	GO:0008536	Ran GTPase binding	1/239	15/15556	0.207333	0.736397	Zm00001d050526	-	1
	MF	GO:0016811	hydrolase activity, acting on carbon-nitrogen (but not peptide) bonds, in linear amides	1/239	15/15556	0.207333	0.736397	Zm00001d050328	-	1
	MF	GO:0015075	ion transmembrane transporter activity	7/239	314/15556	0.209581	0.736397	Zm00001d050283/Zm00001d050335/Zm00001d050509/Zm00001d050604/Zm00001d050937/Zm00001d051050/Zm00001d051103	-/-/-/-/-/-/-	7
	MF	GO:0016620	oxidoreductase activity, acting on the aldehyde or oxo group of donors, NAD or NADP as acceptor	1/239	17/15556	0.231526	0.736397	Zm00001d051001	-	1
	MF	GO:0030695	GTPase regulator activity	2/239	60/15556	0.235217	0.736397	Zm00001d050984/Zm00001d051187	-/-	2
	MF	GO:0004843	thiol-dependent ubiquitin-specific protease activity	2/239	61/15556	0.240908	0.736397	Zm00001d050488/Zm00001d050489	-/-	2
	MF	GO:0019783	ubiquitin-like protein-specific protease activity	2/239	61/15556	0.240908	0.736397	Zm00001d050488/Zm00001d050489	-/-	2
	MF	GO:0036459	thiol-dependent ubiquitinyl hydrolase activity	2/239	61/15556	0.240908	0.736397	Zm00001d050488/Zm00001d050489	-/-	2
	MF	GO:0101005	ubiquitinyl hydrolase activity	2/239	61/15556	0.240908	0.736397	Zm00001d050488/Zm00001d050489	-/-	2
	MF	GO:0003843	1,3-beta-D-glucan synthase activity	1/239	18/15556	0.243346	0.736397	Zm00001d050344	-	1
	MF	GO:0004842	ubiquitin-protein transferase activity	3/239	112/15556	0.247398	0.736397	Zm00001d050308/Zm00001d050689/Zm00001d050712	-/-/-	3
	MF	GO:0019787	ubiquitin-like protein transferase activity	3/239	112/15556	0.247398	0.736397	Zm00001d050308/Zm00001d050689/Zm00001d050712	-/-/-	3
	MF	GO:0016791	phosphatase activity	5/239	219/15556	0.247498	0.736397	Zm00001d050415/Zm00001d050614/Zm00001d051199/Zm00001d051200/Zm00001d051202	-/-/-/-/-	5
	MF	GO:0008641	ubiquitin-like modifier activating enzyme activity	1/239	19/15556	0.254985	0.736397	Zm00001d051265	-	1
	MF	GO:0015095	magnesium ion transmembrane transporter activity	1/239	19/15556	0.254985	0.736397	Zm00001d050604	-	1
	MF	GO:0016877	ligase activity, forming carbon-sulfur bonds	1/239	19/15556	0.254985	0.736397	Zm00001d051265	-	1
	MF	GO:0015267	channel activity	3/239	114/15556	0.255642	0.736397	Zm00001d051050/Zm00001d051103/Zm00001d051174	-/-/-	3
	MF	GO:0022803	passive transmembrane transporter activity	3/239	114/15556	0.255642	0.736397	Zm00001d051050/Zm00001d051103/Zm00001d051174	-/-/-	3
	MF	GO:0005092	GDP-dissociation inhibitor activity	1/239	21/15556	0.27773	0.736397	Zm00001d050984	-	1
	MF	GO:0005216	ion channel activity	2/239	68/15556	0.280839	0.736397	Zm00001d051050/Zm00001d051103	-/-	2
	MF	GO:0022838	substrate-specific channel activity	2/239	68/15556	0.280839	0.736397	Zm00001d051050/Zm00001d051103	-/-	2
	MF	GO:0015318	inorganic molecular entity transmembrane transporter activity	6/239	288/15556	0.282568	0.736397	Zm00001d050283/Zm00001d050509/Zm00001d050604/Zm00001d050937/Zm00001d051050/Zm00001d051103	-/-/-/-/-/-	6
	MF	GO:0016278	lysine N-methyltransferase activity	1/239	22/15556	0.288842	0.736397	Zm00001d051126	-	1
	MF	GO:0016279	protein-lysine N-methyltransferase activity	1/239	22/15556	0.288842	0.736397	Zm00001d051126	-	1
	MF	GO:0018024	histone-lysine N-methyltransferase activity	1/239	22/15556	0.288842	0.736397	Zm00001d051126	-	1
	MF	GO:0042054	histone methyltransferase activity	1/239	22/15556	0.288842	0.736397	Zm00001d051126	-	1
	MF	GO:0003755	peptidyl-prolyl cis-trans isomerase activity	2/239	70/15556	0.292237	0.736397	Zm00001d050635/Zm00001d050931	-/-	2
	MF	GO:0016859	cis-trans isomerase activity	2/239	70/15556	0.292237	0.736397	Zm00001d050635/Zm00001d050931	-/-	2
	MF	GO:0019888	protein phosphatase regulator activity	1/239	23/15556	0.299783	0.736397	Zm00001d051007	-	1
	MF	GO:1901681	sulfur compound binding	1/239	23/15556	0.299783	0.736397	Zm00001d050567	-	1
	MF	GO:0051287	NAD binding	2/239	72/15556	0.303612	0.736397	Zm00001d050810/Zm00001d051001	-/-	2
	MF	GO:0008276	protein methyltransferase activity	1/239	24/15556	0.310557	0.736397	Zm00001d051126	-	1
	MF	GO:0016717	oxidoreductase activity, acting on paired donors, with oxidation of a pair of donors resulting in the reduction of molecular oxygen to two molecules of water	1/239	24/15556	0.310557	0.736397	Zm00001d050552	-	1
	MF	GO:0019208	phosphatase regulator activity	1/239	24/15556	0.310557	0.736397	Zm00001d051007	-	1
	MF	GO:0008270	zinc ion binding	8/239	419/15556	0.316307	0.736397	Zm00001d050642/Zm00001d050793/Zm00001d050884/Zm00001d050938/Zm00001d051018/Zm00001d051029/Zm00001d051052/Zm00001d051126	-/-/-/-/-/-/-/-	8
	MF	GO:0016645	oxidoreductase activity, acting on the CH-NH group of donors	1/239	25/15556	0.321166	0.736397	Zm00001d050448	-	1
	MF	GO:0042393	histone binding	1/239	25/15556	0.321166	0.736397	Zm00001d050816	-	1
	MF	GO:0008170	N-methyltransferase activity	1/239	26/15556	0.331612	0.736397	Zm00001d051126	-	1
	MF	GO:0001882	nucleoside binding	5/239	250/15556	0.339598	0.736397	Zm00001d050284/Zm00001d050755/Zm00001d050915/Zm00001d050969/Zm00001d051260	-/-/-/-/-	5
	MF	GO:0001883	purine nucleoside binding	5/239	250/15556	0.339598	0.736397	Zm00001d050284/Zm00001d050755/Zm00001d050915/Zm00001d050969/Zm00001d051260	-/-/-/-/-	5
	MF	GO:0005525	GTP binding	5/239	250/15556	0.339598	0.736397	Zm00001d050284/Zm00001d050755/Zm00001d050915/Zm00001d050969/Zm00001d051260	-/-/-/-/-	5
	MF	GO:0032549	ribonucleoside binding	5/239	250/15556	0.339598	0.736397	Zm00001d050284/Zm00001d050755/Zm00001d050915/Zm00001d050969/Zm00001d051260	-/-/-/-/-	5
	MF	GO:0032550	purine ribonucleoside binding	5/239	250/15556	0.339598	0.736397	Zm00001d050284/Zm00001d050755/Zm00001d050915/Zm00001d050969/Zm00001d051260	-/-/-/-/-	5
	MF	GO:0032561	guanyl ribonucleotide binding	5/239	250/15556	0.339598	0.736397	Zm00001d050284/Zm00001d050755/Zm00001d050915/Zm00001d050969/Zm00001d051260	-/-/-/-/-	5
	MF	GO:0016903	oxidoreductase activity, acting on the aldehyde or oxo group of donors	1/239	27/15556	0.341898	0.736397	Zm00001d051001	-	1
	MF	GO:0019001	guanyl nucleotide binding	5/239	254/15556	0.351766	0.739257	Zm00001d050284/Zm00001d050755/Zm00001d050915/Zm00001d050969/Zm00001d051260	-/-/-/-/-	5
	MF	GO:0004499	N,N-dimethylaniline monooxygenase activity	1/239	28/15556	0.352027	0.739257	Zm00001d050326	-	1
	MF	GO:0008081	phosphoric diester hydrolase activity	1/239	30/15556	0.371821	0.761779	Zm00001d050917	-	1
	MF	GO:0016709	oxidoreductase activity, acting on paired donors, with incorporation or reduction of molecular oxygen, NAD(P)H as one donor, and incorporation of one atom of oxygen	1/239	30/15556	0.371821	0.761779	Zm00001d050326	-	1
	MF	GO:0016705	oxidoreductase activity, acting on paired donors, with incorporation or reduction of molecular oxygen	7/239	388/15556	0.387289	0.769913	Zm00001d050323/Zm00001d050326/Zm00001d050371/Zm00001d050552/Zm00001d050628/Zm00001d050955/Zm00001d050977	-/-/-/-/-/-/-	7
	MF	GO:0051087	chaperone binding	1/239	32/15556	0.391012	0.769913	Zm00001d051062	-	1
	MF	GO:0016810	hydrolase activity, acting on carbon-nitrogen (but not peptide) bonds	1/239	34/15556	0.40962	0.769913	Zm00001d050328	-	1
	MF	GO:0016758	transferase activity, transferring hexosyl groups	4/239	213/15556	0.414438	0.769913	Zm00001d050322/Zm00001d050344/Zm00001d050961/Zm00001d051136	-/-/-/-	4
	MF	GO:0016887	ATPase activity	5/239	278/15556	0.424832	0.769913	Zm00001d050298/Zm00001d050303/Zm00001d050616/Zm00001d050674/Zm00001d050822	-/-/-/-/-	5
	MF	GO:0004497	monooxygenase activity	1/239	36/15556	0.427661	0.769913	Zm00001d050326	-	1
	MF	GO:0017016	Ras GTPase binding	1/239	36/15556	0.427661	0.769913	Zm00001d050526	-	1
	MF	GO:0031267	small GTPase binding	1/239	36/15556	0.427661	0.769913	Zm00001d050526	-	1
	MF	GO:0015297	antiporter activity	2/239	96/15556	0.435473	0.769913	Zm00001d050457/Zm00001d050509	-/-	2
	MF	GO:0008757	S-adenosylmethionine-dependent methyltransferase activity	1/239	37/15556	0.436475	0.769913	Zm00001d051126	-	1
	MF	GO:0015298	solute:cation antiporter activity	1/239	37/15556	0.436475	0.769913	Zm00001d050509	-	1
	MF	GO:0015299	solute:proton antiporter activity	1/239	37/15556	0.436475	0.769913	Zm00001d050509	-	1
	MF	GO:0015291	secondary active transmembrane transporter activity	2/239	97/15556	0.440697	0.769913	Zm00001d050457/Zm00001d050509	-/-	2
	MF	GO:0050662	coenzyme binding	6/239	347/15556	0.443023	0.769913	Zm00001d050326/Zm00001d050567/Zm00001d050694/Zm00001d050810/Zm00001d051001/Zm00001d051130	-/-/-/-/-/-	6
	MF	GO:0004386	helicase activity	6/239	348/15556	0.445741	0.769913	Zm00001d050287/Zm00001d050315/Zm00001d050378/Zm00001d050503/Zm00001d050541/Zm00001d050627	-/-/-/-/-/-	6
	MF	GO:0008324	cation transmembrane transporter activity	4/239	224/15556	0.452112	0.769913	Zm00001d050335/Zm00001d050509/Zm00001d050604/Zm00001d050937	-/-/-/-	4
	MF	GO:0005096	GTPase activator activity	1/239	39/15556	0.453699	0.769913	Zm00001d051187	-	1
	MF	GO:0005516	calmodulin binding	1/239	40/15556	0.462113	0.77635	Zm00001d050800	-	1
	MF	GO:0015079	potassium ion transmembrane transporter activity	1/239	42/15556	0.478557	0.796015	Zm00001d050937	-	1
	MF	GO:0005543	phospholipid binding	1/239	44/15556	0.4945	0.803661	Zm00001d050346	-	1
	MF	GO:0022804	active transmembrane transporter activity	4/239	237/15556	0.495583	0.803661	Zm00001d050298/Zm00001d050457/Zm00001d050509/Zm00001d050674	-/-/-/-	4
	MF	GO:0003678	DNA helicase activity	5/239	304/15556	0.502119	0.803661	Zm00001d050287/Zm00001d050378/Zm00001d050503/Zm00001d050541/Zm00001d050627	-/-/-/-/-	5
	MF	GO:0051020	GTPase binding	1/239	45/15556	0.502288	0.803661	Zm00001d050526	-	1
	MF	GO:0003735	structural constituent of ribosome	6/239	372/15556	0.509946	0.808217	Zm00001d050411/Zm00001d050496/Zm00001d050532/Zm00001d050675/Zm00001d050920/Zm00001d050921	-/-/-/-/-/-	6
	MF	GO:0046873	metal ion transmembrane transporter activity	2/239	114/15556	0.525169	0.820372	Zm00001d050604/Zm00001d050937	-/-	2
	MF	GO:0019842	vitamin binding	2/239	115/15556	0.529866	0.820372	Zm00001d050567/Zm00001d050694	-/-	2
	MF	GO:0008047	enzyme activator activity	1/239	49/15556	0.532265	0.820372	Zm00001d051187	-	1
	MF	GO:0030234	enzyme regulator activity	4/239	252/15556	0.54385	0.821406	Zm00001d050984/Zm00001d051007/Zm00001d051062/Zm00001d051187	-/-/-/-	4
	MF	GO:0004222	metalloendopeptidase activity	1/239	51/15556	0.546572	0.821406	Zm00001d050962	-	1
	MF	GO:0050660	flavin adenine dinucleotide binding	2/239	119/15556	0.548339	0.821406	Zm00001d050326/Zm00001d051130	-/-	2
	MF	GO:0042626	ATPase activity, coupled to transmembrane movement of substances	2/239	121/15556	0.557383	0.821406	Zm00001d050298/Zm00001d050674	-/-	2
	MF	GO:0043492	ATPase activity, coupled to movement of substances	2/239	121/15556	0.557383	0.821406	Zm00001d050298/Zm00001d050674	-/-	2
	MF	GO:0042910	xenobiotic transmembrane transporter activity	1/239	54/15556	0.56722	0.828634	Zm00001d050457	-	1
	MF	GO:0016702	oxidoreductase activity, acting on single donors with incorporation of molecular oxygen, incorporation of two atoms of oxygen	1/239	58/15556	0.593301	0.834608	Zm00001d050468	-	1
	MF	GO:0051213	dioxygenase activity	1/239	58/15556	0.593301	0.834608	Zm00001d050468	-	1
	MF	GO:0015077	monovalent inorganic cation transmembrane transporter activity	2/239	130/15556	0.596481	0.834608	Zm00001d050509/Zm00001d050937	-/-	2
	MF	GO:0022890	inorganic cation transmembrane transporter activity	3/239	202/15556	0.60299	0.834608	Zm00001d050509/Zm00001d050604/Zm00001d050937	-/-/-	3
	MF	GO:0005198	structural molecule activity	6/239	410/15556	0.60526	0.834608	Zm00001d050411/Zm00001d050496/Zm00001d050532/Zm00001d050675/Zm00001d050920/Zm00001d050921	-/-/-/-/-/-	6
	MF	GO:0003924	GTPase activity	3/239	205/15556	0.612981	0.834608	Zm00001d050915/Zm00001d050969/Zm00001d051260	-/-/-	3
	MF	GO:0030246	carbohydrate binding	3/239	205/15556	0.612981	0.834608	Zm00001d050465/Zm00001d050829/Zm00001d050885	-/-/-	3
	MF	GO:0004185	serine-type carboxypeptidase activity	1/239	63/15556	0.623712	0.834608	Zm00001d051206	-	1
	MF	GO:0070008	serine-type exopeptidase activity	1/239	63/15556	0.623712	0.834608	Zm00001d051206	-	1
	MF	GO:0140097	catalytic activity, acting on DNA	5/239	353/15556	0.634773	0.834608	Zm00001d050287/Zm00001d050378/Zm00001d050503/Zm00001d050541/Zm00001d050627	-/-/-/-/-	5
	MF	GO:0016701	oxidoreductase activity, acting on single donors with incorporation of molecular oxygen	1/239	65/15556	0.635232	0.834608	Zm00001d050468	-	1
	MF	GO:0015399	primary active transmembrane transporter activity	2/239	140/15556	0.636834	0.834608	Zm00001d050298/Zm00001d050674	-/-	2
	MF	GO:0015405	P-P-bond-hydrolysis-driven transmembrane transporter activity	2/239	140/15556	0.636834	0.834608	Zm00001d050298/Zm00001d050674	-/-	2
	MF	GO:0004180	carboxypeptidase activity	1/239	66/15556	0.64086	0.834608	Zm00001d051206	-	1
	MF	GO:0098772	molecular function regulator	4/239	287/15556	0.646362	0.835298	Zm00001d050984/Zm00001d051007/Zm00001d051062/Zm00001d051187	-/-/-/-	4
	MF	GO:0019899	enzyme binding	1/239	70/15556	0.662519	0.842866	Zm00001d050526	-	1
	MF	GO:0042623	ATPase activity, coupled	2/239	149/15556	0.670396	0.842866	Zm00001d050298/Zm00001d050674	-/-	2
	MF	GO:0005509	calcium ion binding	3/239	224/15556	0.672286	0.842866	Zm00001d050346/Zm00001d050889/Zm00001d051069	-/-/-	3
	MF	GO:0016829	lyase activity	3/239	224/15556	0.672286	0.842866	Zm00001d050694/Zm00001d050844/Zm00001d051056	-/-/-	3
	MF	GO:0008238	exopeptidase activity	1/239	77/15556	0.697339	0.860862	Zm00001d051206	-	1
	MF	GO:0005506	iron ion binding	5/239	380/15556	0.697918	0.860862	Zm00001d050323/Zm00001d050371/Zm00001d050628/Zm00001d050955/Zm00001d050977	-/-/-/-/-	5
	MF	GO:0000287	magnesium ion binding	1/239	78/15556	0.702012	0.860862	Zm00001d050567	-	1
	MF	GO:0001871	pattern binding	1/239	81/15556	0.715605	0.864904	Zm00001d050465	-	1
	MF	GO:0030247	polysaccharide binding	1/239	81/15556	0.715605	0.864904	Zm00001d050465	-	1
	MF	GO:0015078	proton transmembrane transporter activity	1/239	88/15556	0.744968	0.892317	Zm00001d050509	-	1
	MF	GO:0035251	UDP-glucosyltransferase activity	1/239	89/15556	0.748909	0.892317	Zm00001d050344	-	1
	MF	GO:0008237	metallopeptidase activity	1/239	98/15556	0.781754	0.893697	Zm00001d050962	-	1
	MF	GO:0008289	lipid binding	1/239	98/15556	0.781754	0.893697	Zm00001d050346	-	1
	MF	GO:0030170	pyridoxal phosphate binding	1/239	99/15556	0.785128	0.893697	Zm00001d050694	-	1
	MF	GO:0070279	vitamin B6 binding	1/239	99/15556	0.785128	0.893697	Zm00001d050694	-	1
	MF	GO:0043565	sequence-specific DNA binding	3/239	269/15556	0.785517	0.893697	Zm00001d050247/Zm00001d050310/Zm00001d050834	-/-/-	3
	MF	GO:0003723	RNA binding	5/239	426/15556	0.787343	0.893697	Zm00001d050266/Zm00001d050315/Zm00001d050515/Zm00001d051116/Zm00001d051183	-/-/-/-/-	5
	MF	GO:0008236	serine-type peptidase activity	2/239	190/15556	0.792624	0.893697	Zm00001d051169/Zm00001d051206	-/-	2
	MF	GO:0017171	serine hydrolase activity	2/239	190/15556	0.792624	0.893697	Zm00001d051169/Zm00001d051206	-/-	2
	MF	GO:0008194	UDP-glycosyltransferase activity	3/239	277/15556	0.801857	0.89808	Zm00001d050344/Zm00001d050961/Zm00001d051136	-/-/-	3
	MF	GO:0016684	oxidoreductase activity, acting on peroxide as acceptor	2/239	204/15556	0.824177	0.911923	Zm00001d050572/Zm00001d050666	-/-	2
	MF	GO:0016853	isomerase activity	2/239	208/15556	0.832368	0.911923	Zm00001d050635/Zm00001d050931	-/-	2
	MF	GO:0004553	hydrolase activity, hydrolyzing O-glycosyl compounds	4/239	377/15556	0.834752	0.911923	Zm00001d050490/Zm00001d050645/Zm00001d050716/Zm00001d050974	-/-/-/-	4
	MF	GO:0008234	cysteine-type peptidase activity	3/239	298/15556	0.839856	0.911923	Zm00001d050287/Zm00001d050488/Zm00001d050489	-/-/-	3
	MF	GO:0016209	antioxidant activity	2/239	214/15556	0.844013	0.911923	Zm00001d050572/Zm00001d050666	-/-	2
	MF	GO:0046527	glucosyltransferase activity	1/239	122/15556	0.849889	0.911923	Zm00001d050344	-	1
	MF	GO:0009055	electron transfer activity	1/239	123/15556	0.852213	0.911923	Zm00001d051118	-	1
	MF	GO:0016798	hydrolase activity, acting on glycosyl bonds	4/239	410/15556	0.878841	0.931113	Zm00001d050490/Zm00001d050645/Zm00001d050716/Zm00001d050974	-/-/-/-	4
	MF	GO:0046982	protein heterodimerization activity	1/239	137/15556	0.881232	0.931113	Zm00001d050697	-	1
	MF	GO:0004857	enzyme inhibitor activity	1/239	150/15556	0.903068	0.941716	Zm00001d051007	-	1
	MF	GO:0008168	methyltransferase activity	2/239	259/15556	0.910427	0.941716	Zm00001d050515/Zm00001d051126	-/-	2
	MF	GO:0016746	transferase activity, transferring acyl groups	3/239	359/15556	0.916707	0.941716	Zm00001d050320/Zm00001d050383/Zm00001d050455	-/-/-	3
	MF	GO:0004175	endopeptidase activity	1/239	161/15556	0.918389	0.941716	Zm00001d050962	-	1
	MF	GO:0016874	ligase activity	1/239	165/15556	0.92334	0.941716	Zm00001d051265	-	1
	MF	GO:0016747	transferase activity, transferring acyl groups other than amino-acyl groups	2/239	277/15556	0.928706	0.941716	Zm00001d050320/Zm00001d050455	-/-	2
	MF	GO:0016741	transferase activity, transferring one-carbon groups	2/239	279/15556	0.930505	0.941716	Zm00001d050515/Zm00001d051126	-/-	2
	MF	GO:0004601	peroxidase activity	1/239	201/15556	0.956389	0.962116	Zm00001d050572	-	1
	MF	GO:0140098	catalytic activity, acting on RNA	1/239	231/15556	0.972772	0.972772	Zm00001d050315	-	1
