# Supplementary material for: Genome-Wide Association Studies on the Kernel Row Number in a Multi-Parent Maize Population
Source: Int J Mol Sci. 2024 Mar 16;25(6):3377. doi: 10.3390/ijms25063377 (PMC10970222; doi:10.3390/ijms25063377)
Supplement: Supplementary file 1 [file ijms-25-03377-s001.zip › Table S6.xlsx]

## Sheet: Sheet1
Table S6 KEGG Analysis
	KEGGID	Description	GeneRatio	BgRatio	pvalue	padj	geneID	geneName	keggID	Count
Sub-pop3/22YS and Sub-pop4/BLUP	zma00062	Fatty acid elongation	0.25	40/5493	0.0288191	0.125494	Zm00001d048953	-	zma:103655094	1
	zma00053	Ascorbate and aldarate metabolism	0.25	60/5493	0.0429928	0.125494	Zm00001d048954	-	zma:100280325	1
	zma00040	Pentose and glucuronate interconversions	0.25	77/5493	0.054918	0.125494	Zm00001d048936	-	zma:103627042	1
	zma01250	Biosynthesis of nucleotide sugars	0.25	105/5493	0.0743161	0.125494	Zm00001d048954	-	zma:100280325	1
	zma00480	Glutathione metabolism	0.25	111/5493	0.0784337	0.125494	Zm00001d048923	-	zma:103652802	1
	zma00520	Amino sugar and nucleotide sugar metabolism	0.25	160/5493	0.111549	0.148731	Zm00001d048954	-	zma:100280325	1
	zma04626	Plant-pathogen interaction	0.25	228/5493	0.156015	0.178303	Zm00001d048953	-	zma:103655094	1
	zma01240	Biosynthesis of cofactors	0.25	265/5493	0.179498	0.179498	Zm00001d048954	-	zma:100280325	1
Sub-Pop3/21JH and Sub-pop4/22YS	zma00650	Butanoate metabolism	3/83	30/5493	0.0100666	0.412622	Zm00001d050567/Zm00001d050810/Zm00001d051043	-/-/-	zma:100274341/zma:100282207/zma:100284799	3
	zma00902	Monoterpenoid biosynthesis	2/83	12/5493	0.0134956	0.412622	Zm00001d051251/Zm00001d051254	-/-	zma:100191789/zma:100273237	2
	zma00770	Pantothenate and CoA biosynthesis	3/83	40/5493	0.0219956	0.412622	Zm00001d050567/Zm00001d050865/Zm00001d051043	-/-/-	zma:100274341/zma:100283870/zma:100284799	3
	zma00020	Citrate cycle (TCA cycle)	4/83	72/5493	0.0229235	0.412622	Zm00001d050383/Zm00001d050409/Zm00001d050965/Zm00001d051129	-/-/-/-	zma:100279373/zma:100193663/zma:100274026/zma:100284286	4
	zma00290	Valine, leucine and isoleucine biosynthesis	2/83	22/5493	0.0428591	0.507034	Zm00001d050567/Zm00001d051043	-/-	zma:100274341/zma:100284799	2
	zma00563	Glycosylphosphatidylinositol (GPI)-anchor biosynthesis	2/83	24/5493	0.0502293	0.507034	Zm00001d051025/Zm00001d051136	-/-	zma:103629437/zma:100273079	2
	zma04712	Circadian rhythm - plant	3/83	58/5493	0.0566948	0.507034	Zm00001d050850/Zm00001d051114/Zm00001d051216	-/-/-	zma:100502533/zma:100281433/zma:100284201	3
	zma01210	2-Oxocarboxylic acid metabolism	3/83	61/5493	0.0640614	0.507034	Zm00001d050567/Zm00001d050965/Zm00001d051043	-/-/-	zma:100274341/zma:100274026/zma:100284799	3
	zma01200	Carbon metabolism	8/83	290/5493	0.0702079	0.507034	Zm00001d050328/Zm00001d050383/Zm00001d050409/Zm00001d050428/Zm00001d050810/Zm00001d050965/Zm00001d051001/Zm00001d051129	-/-/-/-/-/-/-/-	zma:103635347/zma:100279373/zma:100193663/zma:542583/zma:100282207/zma:100274026/zma:542333/zma:100284286	8
	zma01040	Biosynthesis of unsaturated fatty acids	2/83	29/5493	0.0704214	0.507034	Zm00001d050552/Zm00001d050992	-/-	zma:100272745/zma:103653730	2
	zma00790	Folate biosynthesis	2/83	31/5493	0.079126	0.517916	Zm00001d050844/Zm00001d051041	-/-	zma:100383821/zma:103653744	2
	zma00360	Phenylalanine metabolism	2/83	34/5493	0.0927683	0.540884	Zm00001d051163/Zm00001d051166	-/-	zma:100285115/zma:100281532	2
	zma03018	RNA degradation	4/83	116/5493	0.0976596	0.540884	Zm00001d050433/Zm00001d050434/Zm00001d050770/Zm00001d051268	-/-/-/-	zma:100193030/zma:100383807/zma:103654004/zma:100282580	4
	zma00630	Glyoxylate and dicarboxylate metabolism	3/83	79/5493	0.116522	0.599258	Zm00001d050328/Zm00001d050409/Zm00001d050810	-/-/-	zma:103635347/zma:100193663/zma:100282207	3
	zma03450	Non-homologous end-joining	1/83	10/5493	0.141338	0.640394	Zm00001d050612	-	zma:103653563	1
	zma00941	Flavonoid biosynthesis	2/83	44/5493	0.14231	0.640394	Zm00001d050455/Zm00001d050955	-/-	zma:100284063/zma:103653707	2
	zma00460	Cyanoamino acid metabolism	2/83	46/5493	0.152802	0.647161	Zm00001d050328/Zm00001d051214	-/-	zma:103635347/zma:542093	2
	zma01232	Nucleotide metabolism	3/83	95/5493	0.172815	0.657556	Zm00001d050717/Zm00001d051080/Zm00001d051157	-/-/-	zma:100272244/zma:100275070/zma:103653801	3
	zma00590	Arachidonic acid metabolism	1/83	13/5493	0.179753	0.657556	Zm00001d051041	-	zma:103653744	1
	zma00430	Taurine and hypotaurine metabolism	1/83	14/5493	0.192176	0.657556	Zm00001d050326	-	zma:100304251	1
	zma00330	Arginine and proline metabolism	2/83	55/5493	0.201595	0.657556	Zm00001d051056/Zm00001d051194	-/-	zma:100283320/zma:100193626	2
	zma00010	Glycolysis / Gluconeogenesis	4/83	154/5493	0.203055	0.657556	Zm00001d050383/Zm00001d050428/Zm00001d051001/Zm00001d051227	-/-/-/-	zma:100279373/zma:542583/zma:542333/zma:100272578	4
	zma00620	Pyruvate metabolism	3/83	105/5493	0.211271	0.657556	Zm00001d050383/Zm00001d050409/Zm00001d051227	-/-/-	zma:100279373/zma:100193663/zma:100272578	3
	zma00230	Purine metabolism	3/83	107/5493	0.219185	0.657556	Zm00001d050717/Zm00001d051080/Zm00001d051157	-/-/-	zma:100272244/zma:100275070/zma:103653801	3
	zma00909	Sesquiterpenoid and triterpenoid biosynthesis	1/83	17/5493	0.228342	0.657624	Zm00001d050625	-	zma:103653555	1
	zma00195	Photosynthesis	2/83	68/5493	0.274447	0.734269	Zm00001d050678/Zm00001d050889	-/-	zma:845171/zma:103653672	2
	zma03013	Nucleocytoplasmic transport	3/83	125/5493	0.292604	0.734269	Zm00001d050526/Zm00001d051065/Zm00001d051183	-/-/-	zma:103655412/zma:100280855/zma:103627442	3
	zma00196	Photosynthesis - antenna proteins	1/83	23/5493	0.295942	0.734269	Zm00001d050403	-	zma:100280410	1
	zma01212	Fatty acid metabolism	2/83	73/5493	0.302579	0.734269	Zm00001d050552/Zm00001d050992	-/-	zma:100272745/zma:103653730	2
	zma00740	Riboflavin metabolism	1/83	24/5493	0.306625	0.734269	Zm00001d050844	-	zma:100383821	1
	zma00940	Phenylpropanoid biosynthesis	4/83	188/5493	0.316144	0.734269	Zm00001d050417/Zm00001d050455/Zm00001d051163/Zm00001d051166	-/-/-/-	zma:109946031/zma:100284063/zma:100285115/zma:100281532	4
	zma04075	Plant hormone signal transduction	6/83	312/5493	0.332061	0.747138	Zm00001d050365/Zm00001d050723/Zm00001d050768/Zm00001d050781/Zm00001d050861/Zm00001d050903	-/-/-/-/-/-	zma:100285509/zma:100216941/zma:541633/zma:100285977/zma:103653667/zma:103653681	6
	zma00710	Carbon fixation in photosynthetic organisms	2/83	81/5493	0.347171	0.747283	Zm00001d050409/Zm00001d051001	-/-	zma:100193663/zma:542333	2
	zma00945	Stilbenoid, diarylheptanoid and gingerol biosynthesis	1/83	29/5493	0.357685	0.747283	Zm00001d050455	-	zma:100284063	1
	zma00640	Propanoate metabolism	1/83	32/5493	0.386519	0.747283	Zm00001d051129	-	zma:100284286	1
	zma01230	Biosynthesis of amino acids	5/83	271/5493	0.390186	0.747283	Zm00001d050412/Zm00001d050567/Zm00001d050965/Zm00001d051001/Zm00001d051043	-/-/-/-/-	zma:103653478/zma:100274341/zma:100274026/zma:542333/zma:100284799	5
	zma03015	mRNA surveillance pathway	3/83	150/5493	0.396528	0.747283	Zm00001d050266/Zm00001d051065/Zm00001d051183	-/-/-	zma:100280946/zma:100280855/zma:103627442	3
	zma03008	Ribosome biogenesis in eukaryotes	2/83	95/5493	0.422741	0.747283	Zm00001d050515/Zm00001d051116	-/-	zma:100282167/zma:100284497	2
	zma00785	Lipoic acid metabolism	1/83	37/5493	0.43176	0.747283	Zm00001d050383	-	zma:100279373	1
	zma03430	Mismatch repair	1/83	37/5493	0.43176	0.747283	Zm00001d050929	-	zma:103653697	1
	zma00908	Zeatin biosynthesis	1/83	38/5493	0.440404	0.747283	Zm00001d050371	-	zma:100280269	1
	zma00062	Fatty acid elongation	1/83	40/5493	0.457305	0.747283	Zm00001d050992	-	zma:103653730	1
	zma00350	Tyrosine metabolism	1/83	40/5493	0.457305	0.747283	Zm00001d051227	-	zma:100272578	1
	zma03250	Viral life cycle - HIV-1	1/83	40/5493	0.457305	0.747283	Zm00001d050978	-	zma:100216677	1
	zma00910	Nitrogen metabolism	1/83	42/5493	0.473701	0.747283	Zm00001d050328	-	zma:103635347	1
	zma00513	Various types of N-glycan biosynthesis	1/83	43/5493	0.481715	0.747283	Zm00001d050885	-	zma:103655502	1
	zma00510	N-Glycan biosynthesis	1/83	47/5493	0.512582	0.747283	Zm00001d050961	-	zma:100282765	1
	zma00061	Fatty acid biosynthesis	1/83	48/5493	0.520011	0.747283	Zm00001d050552	-	zma:100272745	1
	zma00071	Fatty acid degradation	1/83	49/5493	0.527327	0.747283	Zm00001d051227	-	zma:100272578	1
	zma04136	Autophagy - other	1/83	49/5493	0.527327	0.747283	Zm00001d051021	-	zma:109939169	1
	zma00280	Valine, leucine and isoleucine degradation	1/83	51/5493	0.541631	0.747283	Zm00001d050336	-	zma:100281617	1
	zma03022	Basal transcription factors	1/83	52/5493	0.548622	0.747283	Zm00001d050853	-	zma:100277408	1
	zma00564	Glycerophospholipid metabolism	2/83	124/5493	0.563476	0.747283	Zm00001d050694/Zm00001d051063	-/-	zma:103653609/zma:100276493	2
	zma00400	Phenylalanine, tyrosine and tryptophan biosynthesis	1/83	57/5493	0.582028	0.747283	Zm00001d050412	-	zma:103653478	1
	zma00270	Cysteine and methionine metabolism	2/83	130/5493	0.589429	0.747283	Zm00001d050409/Zm00001d051056	-/-	zma:100193663/zma:100283320	2
	zma03060	Protein export	1/83	59/5493	0.594695	0.747283	Zm00001d050258	-	zma:100283769	1
	zma03440	Homologous recombination	1/83	60/5493	0.600886	0.747283	Zm00001d050612	-	zma:103653563	1
	zma00190	Oxidative phosphorylation	2/83	133/5493	0.601978	0.747283	Zm00001d050678/Zm00001d051055	-/-	zma:845171/zma:100272303	2
	zma00030	Pentose phosphate pathway	1/83	65/5493	0.630465	0.7559	Zm00001d050428	-	zma:542583	1
	zma03040	Spliceosome	3/83	217/5493	0.643486	0.7559	Zm00001d050316/Zm00001d051052/Zm00001d051065	-/-/-	zma:103653436/zma:100273521/zma:100280855	3
	zma03050	Proteasome	1/83	71/5493	0.663113	0.7559	Zm00001d051211	-	zma:100192809	1
	zma04626	Plant-pathogen interaction	3/83	228/5493	0.676737	0.7559	Zm00001d050575/Zm00001d050655/Zm00001d050969	-/-/-	zma:100283091/zma:103653593/zma:100283194	3
	zma00240	Pyrimidine metabolism	1/83	74/5493	0.678352	0.7559	Zm00001d050717	-	zma:100272244	1
	zma00260	Glycine, serine and threonine metabolism	1/83	75/5493	0.683278	0.7559	Zm00001d050339	-	zma:100302679	1
	zma04070	Phosphatidylinositol signaling system	1/83	76/5493	0.68813	0.7559	Zm00001d050737	-	zma:103653626	1
	zma00562	Inositol phosphate metabolism	1/83	77/5493	0.692909	0.7559	Zm00001d050737	-	zma:103653626	1
	zma04016	MAPK signaling pathway - plant	2/83	170/5493	0.733683	0.788436	Zm00001d050723/Zm00001d050861	-/-	zma:100216941/zma:103653667	2
	zma04144	Endocytosis	2/83	181/5493	0.765065	0.810068	Zm00001d050978/Zm00001d051188	-/-	zma:100216677/zma:100383867	2
	zma04814	Motor proteins	1/83	102/5493	0.791448	0.825858	Zm00001d050905	-	zma:100284151	1
	zma03010	Ribosome	3/83	314/5493	0.86192	0.886547	Zm00001d050411/Zm00001d050675/Zm00001d050921	-/-/-	zma:100286275/zma:100533139/zma:103653691	3
	zma01240	Biosynthesis of cofactors	2/83	265/5493	0.91566	0.921978	Zm00001d050844/Zm00001d050865	-/-	zma:100383821/zma:100283870	2
	zma00500	Starch and sucrose metabolism	1/83	165/5493	0.921978	0.921978	Zm00001d050293	-	zma:103653427	1
