# Supplementary figures and images for: Genome-Wide Association Studies on the Kernel Row Number in a Multi-Parent Maize Population
Source: MDPI journal article supplement (doi:10.3390/ijms25063377), 2024-03-16

a

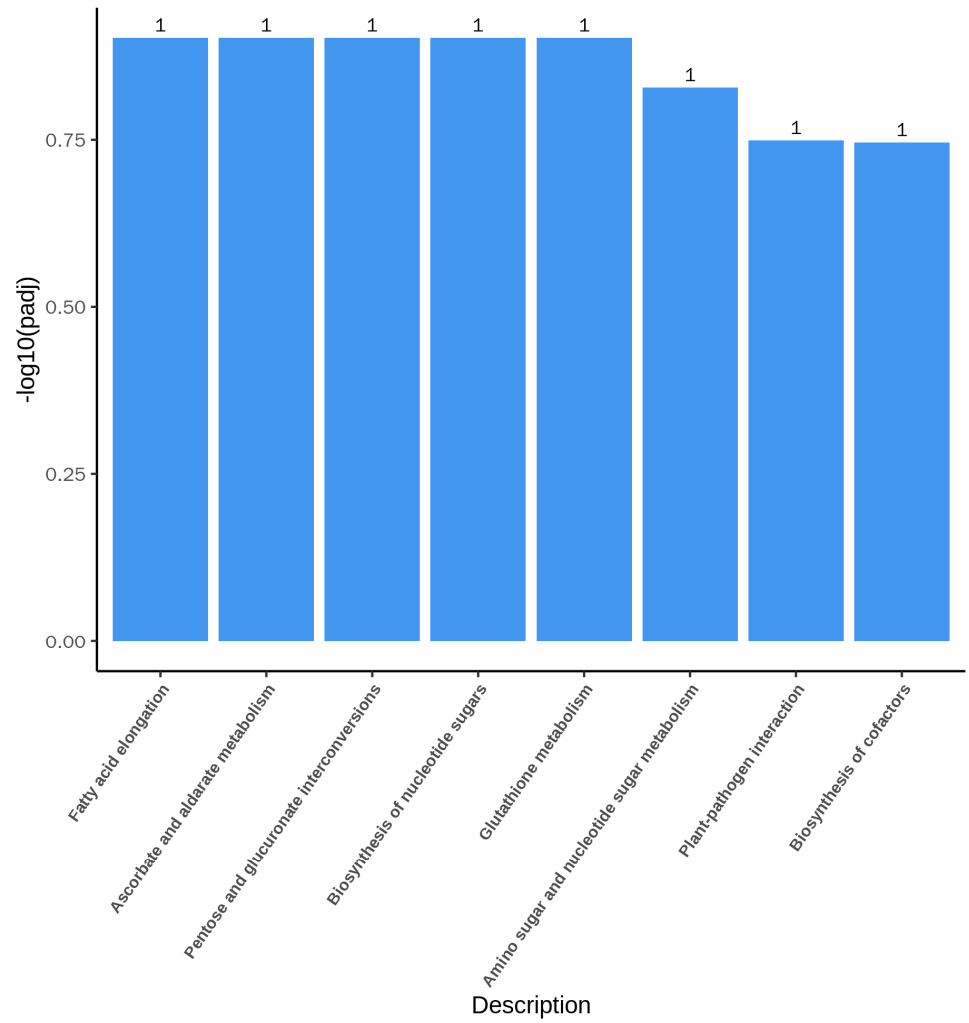

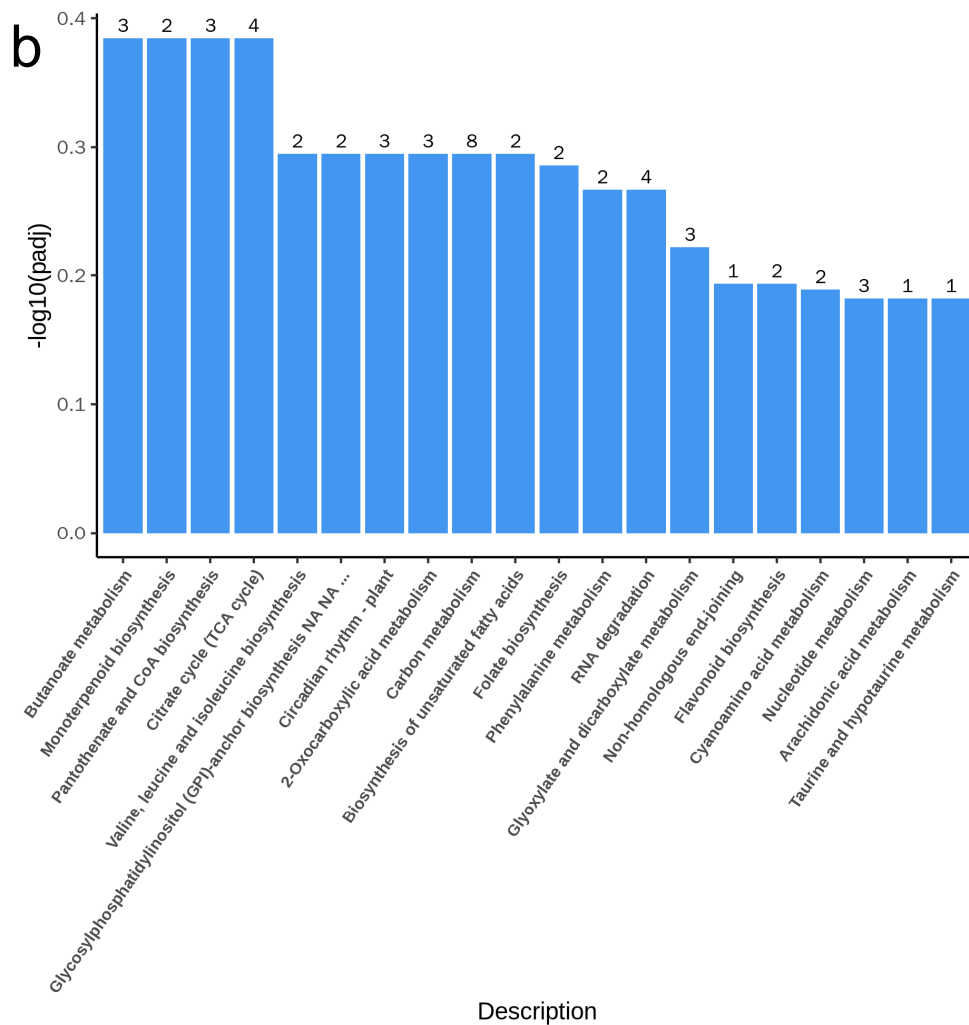

Supplement: s1 [file s1]
